# Supplementary material
Source: PubMed Central journal article supplement (PMC8201918)
Supplement: pnas.2024125118.sapp.pdf [file pnas.2024125118.sapp.pdf]

1

## 2 **Supplementary Information for**

### 3 **Elite rhetoric can undermine democratic norms**

4 **Katherine Clayton, Nicholas T. Davis, Brendan Nyhan, Ethan Porter, Timothy J. Ryan, and Thomas J. Wood**

5 **Corresponding author: Katherine Clayton**

6 **E-mail: [kpc14stanford.edu](mailto:kpc14stanford.edu)**

#### 7 **This PDF file includes:**

8 Tables S1 to S39 (not allowed for Brief Reports)

9 SI References

## 10 Survey instruments and study stimuli

11 **wave 1 questionnaire.** This study is being conducted by Katie Clayton of Stanford University, Nicholas Davis of the University  
12 of Alabama, Brendan Nyhan of Dartmouth College, Ethan Porter of George Washington University, Timothy Ryan of the  
13 University of North Carolina at Chapel Hill, and Thomas J. Wood of the Ohio State University. Your participation is voluntary  
14 and you may decline to participate in the survey or withdraw at any time. No information that identifies you will be collected or  
15 retained by the researchers. However, any online interaction carries some risk of being accessed. The survey will take about 3 to  
16 5 minutes to complete. After you complete the survey, we may invite you to participate in subsequent surveys. The purpose of  
17 the study is to better understand the determinants of attitudes about major public challenges. Possible benefits of participation  
18 include having the opportunity to express your opinion about issues of public concern. Possible risks or discomforts you could  
19 experience during this study include breach of confidentiality and boredom. If you experience any research-related injury, you  
20 should contact the Principal Investigator immediately. Further information regarding this study may be obtained by contacting  
21 Brendan Nyhan at nyhan@dartmouth.edu.

22  
23 Whom can I speak with? The Committee for the Protection of Human Subjects at Dartmouth College, which can be reached  
24 at (603) 646-6482, can provide information about your rights as a research participant. You may also contact this office if  
25 you have questions, concerns, or complaints about the research, or wish to speak with someone independent of the research  
26 team. If you wish to provide a written signature to signal your consent, please contact Brendan Nyhan at the email address above.

27  
28 Do you consent to participate in the study?

29 -Yes

30 -No

31  
32 Generally speaking, do you usually think of yourself as a Republican, a Democrat, an Independent, or something else?

33 -Republican

34 -Democrat

35 -Independent

36 -Something else

37  
38 *If "Democrat" is selected:* Would you call yourself a strong Democrat or a not very strong Democrat?

39 -Strong Democrat (1)

40 -Not very strong Democrat (2)

41  
42 *If "Republican" is selected:* Would you call yourself a strong Republican or not a very strong Republican?

43 -Strong Republican (7)

44 -Not very strong Republican (6)

45  
46 *If "Independent" or "Something else" is selected:* Do you think of yourself as closer to the Republican Party or to the Democratic  
47 Party?

48 -Closer to the Republican Party (5)

49 -Closer to the Democratic Party (3)

50 -Neither (4)

51  
52 Do you ever use any of the following social media sites? Please indicate which ones you use below (if any).

53  
54 Twitter

55 -Yes (1)

56 -No (0)

57  
58 Instagram

59 -Yes (1)

60 -No (0)

61  
62 Facebook

63 -Yes (1)

64 -No (0)

65  
66 YouTube

67 -Yes (1)

68 -No (0)

69  
70 WhatsApp

71 -Yes (1)

72 -No (0)

73

74 *If Twitter is selected:* Thinking about the social media sites you use, about how often do you visit or use Twitter?

75 -Several times a day (5)

76 -About once a day (4)

77 -A few times a week (3)

78 -Every few weeks (2)

79 -Less often (1)

80

81 *If Facebook is selected:* Thinking about the social media sites you use, about how often do you visit or use Facebook?

82 -Several times a day (5)

83 -About once a day (4)

84 -A few times a week (3)

85 -Every few weeks (2)

86 -Less often (1)

87

88 Do you approve or disapprove of the way Donald Trump is handling his job as President?

89 -Strongly approve (4)

90 -Somewhat approve (3)

91 -Somewhat disapprove (2)

92 -Strongly disapprove (1)

93

94 How much do you agree or disagree with each of the following statements?

95

96 An important part of democracy is to accept election losses peacefully.

97 -Strongly agree (6)

98 -Somewhat agree (5)

99 -Slightly agree (4)

100 -Slightly disagree (3)

101 -Somewhat disagree (2)

102 -Strongly disagree (1)

103

104 Elections in the United States are rigged in favor of [Democrats (*if respondent identifies or leans Republican*) / Republicans (*if*  
105 *respondent identifies or leans Democrat*); party names randomized if respondent does not identify with or lean toward either  
106 party].

107 -Strongly agree (6)

108 -Somewhat agree (5)

109 -Slightly agree (4)

110 -Slightly disagree (3)

111 -Somewhat disagree (2)

112 -Strongly disagree (1)

113

114 Sometimes regular people need to be a little violent to make sure votes are counted correctly.

115 -Strongly agree (6)

116 -Somewhat agree (5)

117 -Slightly agree (4)

118 -Slightly disagree (3)

119 -Somewhat disagree (2)

120 -Strongly disagree (1)

121

122 Next, we'd like you to think not about 2020, but about the the past fifty years or so. How accurate is each of the following  
123 statements in describing how things generally work in American politics?

124

125 Presidential candidates accept the outcome of elections even if they narrowly lose.

126 -Very accurate (4)

127 -Somewhat accurate (3)

128 -Not very accurate (2)

129 -Not at all accurate (1)

130

131 Presidents do their best to unify the country by downplaying divisions.

- 132 -Very accurate (4)
- 133 -Somewhat accurate (3)
- 134 -Not very accurate (2)
- 135 -Not at all accurate (1)

136

137 Presidents hold meetings or speak on the phone with leaders of other countries to discuss foreign policy and global issues.

- 138 -Very accurate (4)
- 139 -Somewhat accurate (3)
- 140 -Not very accurate (2)
- 141 -Not at all accurate (1)

142

143 Presidents make sure to visit all national parks every year.

- 144 -Very accurate (4)
- 145 -Somewhat accurate (3)
- 146 -Not very accurate (2)
- 147 -Not at all accurate (1)

148

149 How much do you agree or disagree with the following statement? *[paragraph break]* Presidential candidates should accept the  
150 outcome of elections even if they narrowly lose.

- 151 -Strongly agree (6)
- 152 -Somewhat agree (5)
- 153 -Slightly agree (4)
- 154 -Slightly disagree (3)
- 155 -Somewhat disagree (2)
- 156 -Strongly disagree (1)

157

158 Please indicate what percentage of Americans you think would agree with the following statement. If you think every American  
159 would agree, enter 100. If you think no one would agree, enter 0. If you think half of Americans would agree, enter 50. You can  
160 enter any number from 0-100. *[paragraph break]* What percentage of the public do you think would agree with the following  
161 statement? Presidential candidates should accept the outcome of elections even if they narrowly lose.

162 -Value entry, 0-100.

163

164 To what extent do you trust elections in this country? Please respond on the scale below where 1 means “not at all” and 7  
165 means “a lot.”

- 166 -1 (Not at all)
- 167 -2
- 168 -3
- 169 -4
- 170 -5
- 171 -6
- 172 -7 (A lot)

173

174 How confident are you that votes nationwide will be counted as intended in this year’s election?

- 175 -Very confident (4)
- 176 -Somewhat confident (3)
- 177 -Not too confident (2)
- 178 -Not at all confident (1)

179

180 How confident are you that election officials will manage the counting of ballots fairly in the election this November?

- 181 -Very confident (4)
- 182 -Somewhat confident (3)
- 183 -Not too confident (2)
- 184 -Not at all confident (1)

185

186 To the best of your knowledge, how many times does each of these occur in a presidential election?

187

- 188 Voting more than once
- 189 -A million or more (7)
- 190 -Hundreds of thousands (6)
- 191 -Tens of thousands (5)
- 192 -Thousands (4)

193 -Hundreds (3)  
194 -Less than a hundred (2)  
195 -Less than ten (1)  
196  
197 Stealing or tampering with ballots  
198 -A million or more (7)  
199 -Hundreds of thousands (6)  
200 -Tens of thousands (5)  
201 -Thousands (4)  
202 -Hundreds (3)  
203 -Less than a hundred (2)  
204 -Less than ten (1)  
205  
206 Pretending to be someone else when voting  
207 -A million or more (7)  
208 -Hundreds of thousands (6)  
209 -Tens of thousands (5)  
210 -Thousands (4)  
211 -Hundreds (3)  
212 -Less than a hundred (2)  
213 -Less than ten (1)  
214  
215 People voting who are not U.S. citizens  
216 -A million or more (7)  
217 -Hundreds of thousands (6)  
218 -Tens of thousands (5)  
219 -Thousands (4)  
220 -Hundreds (3)  
221 -Less than a hundred (2)  
222 -Less than ten (1)  
223  
224 Voting with an absentee ballot intended for another person  
225 -A million or more (7)  
226 -Hundreds of thousands (6)  
227 -Tens of thousands (5)  
228 -Thousands (4)  
229 -Hundreds (3)  
230 -Less than a hundred (2)  
231 -Less than ten (1)  
232  
233 When, if ever, is it OK for [respondent party (including leaners); randomized if respondent does not identify with or lean  
234 toward either party] to send threatening and intimidating messages to [other party] leaders?  
235 -Always (4)  
236 -Frequently (3)  
237 -Occasionally (2)  
238 -Never (1)  
239  
240 When, if ever, is it OK for an ordinary [respondent party (including leaners); randomized if respondent does not identify with  
241 or lean toward either party] in the public to harass an ordinary [other party] on the Internet, in a way that makes the [other  
242 party] feel unsafe?  
243 -Always (4)  
244 -Frequently (3)  
245 -Occasionally (2)  
246 -Never (1)  
247  
248 How much do you feel it is justified for [respondent party (including leaners); randomized if respondent does not identify with  
249 or lean toward either party] to use violence in advancing their political goals these days?  
250 -Always (4)  
251 -Frequently (3)  
252 -Occasionally (2)  
253 -Never (1)

254  
255 What if the [other party; randomized if respondent does not identify with or lean toward either party] win the 2020 presidential  
256 election? How much do you feel violence would be justified then?  
257 -Always (4)  
258 -Frequently (3)  
259 -Occasionally (2)  
260 -Never (1)

261  
262 Various types of political systems are described below. Please think about each choice in terms of governing this country and  
263 indicate if you think that it would be a very good, fairly good, fairly bad or very bad way of governing the United States.

264  
265 Having a strong leader who does not have to bother with Congress and elections  
266 -Very good (4)  
267 -Fairly good (3)  
268 -Fairly bad (2)  
269 -Very bad (1)

270  
271 Having experts, not government, make decisions according to what they think is best for the country  
272 -Very good (4)  
273 -Fairly good (3)  
274 -Fairly bad (2)  
275 -Very bad (1)

276  
277 Having the army rule  
278 -Very good (4)  
279 -Fairly good (3)  
280 -Fairly bad (2)  
281 -Very bad (1)

282  
283 Having a democratic political system  
284 -Very good (4)  
285 -Fairly good (3)  
286 -Fairly bad (2)  
287 -Very bad (1)

288  
289 Next, we would like you to examine some messages that President Trump posted on Twitter.

290  
291 *[Below is one example; four total tweets were shown. See full list of tweets included by treatment condition.]*  
292

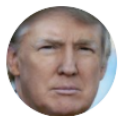

**Donald J. Trump** ✓  
@realDonaldTrump

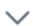

On **#NationalDoctorsDay**, we recognize the remarkable men & women who treat their fellow Americans, find cures for the diseases & illnesses we face, and never waver in their efforts to treat every patient with the dignity, respect, and empathy they deserve.

293 Thinking about the tweets you just saw, how much do you feel:  
294

295 Angry  
296 -Very (4)  
297 -Somewhat (3)  
298 -A little (2)  
299 -Not at all (1)

300  
301 Outraged  
302 -Very (4)  
303 -Somewhat (3)  
304 -A little (2)  
305 -Not at all (1)

306  
307 Anxious  
308 -Very (4)  
309 -Somewhat (3)  
310 -A little (2)  
311 -Not at all (1)

312  
313 Afraid  
314 -Very (4)  
315 -Somewhat (3)  
316 -A little (2)  
317 -Not at all (1)

318  
319 Enthusiastic  
320 -Very (4)  
321 -Somewhat (3)  
322 -A little (2)  
323 -Not at all (1)

324  
325 Happy  
326 -Very (4)  
327 -Somewhat (3)  
328 -A little (2)  
329 -Not at all (1)

330  
331 In talking to people about elections, we often find out that a lot of people aren't able to vote because they were not registered,  
332 or they were sick, or they just didn't have time. How about you – how likely are you to vote in the general election this  
333 November?

334 -Definitely will vote (4)  
335 -Probably will vote (3)  
336 -Probably will not vote (2)  
337 -Definitely will not vote (1)  
338 -Already voted by mail (5)  
339 -Already voted in person (5)

340  
341 If you were casting a vote today in the 2020 presidential election, for whom would you vote for President of the United States?

342 -Joe Biden (Democrat) (1)  
343 -Donald Trump (Republican) (2)  
344 -Another candidate/neither (3)

345  
346 Which of these topics came up in the Donald Trump tweets you just read?

347 - The Parkland shooting, National Doctor's Day, and transit funding for New York and New Orleans (1)  
348 - The Sandy Hook shooting, Thanksgiving, and health care funding for Atlanta (2)  
349 - The 9/11 attacks, Christmas, and military funding for the Navy (3)  
350 - The war in Iraq, Hannukah, and Medicare funding for seniors (4)

351  
352 Do you have any comments on the survey? Please let us know about any problems you had or aspects of the survey that were  
353 confusing.

354 [optional text entry]

355

356 Thank you for answering these questions and for your participation. Please do not share any information about the nature of  
357 this study with other potential participants. This research is not intended to support or oppose any political candidate or  
358 office. The research has no affiliation with any political candidate or campaign and has received no financial support from any  
359 political candidate or campaign. We may contact you to invite you to follow-up studies. Your participation in any follow-up  
360 studies is entirely voluntary and will not affect your compensation for this study. Should you have any questions about this  
361 study, please contact Brendan Nyhan at nyhan@dartmouth.edu.  
362

363 **wave 2 and wave 3 questionnaires.** This study is being conducted by Katie Clayton of Stanford University, Nicholas Davis of the  
364 University of Alabama, Brendan Nyhan of Dartmouth College, Ethan Porter of George Washington University, Timothy Ryan  
365 of the University of North Carolina at Chapel Hill, and Thomas J. Wood of the Ohio State University. Your participation is  
366 voluntary and you may decline to participate in the survey or withdraw at any time. No information that identifies you will  
367 be collected or retained by the researchers. However, any online interaction carries some risk of being accessed. The survey  
368 will take about 3 to 5 minutes to complete. After you complete the survey, we may invite you to participate in subsequent  
369 surveys. The purpose of the study is to better understand the determinants of attitudes about major public challenges. Possible  
370 benefits of participation include having the opportunity to express your opinion about issues of public concern. Possible risks  
371 or discomforts you could experience during this study include breach of confidentiality and boredom. If you experience any  
372 research-related injury, you should contact the Principal Investigator immediately. Further information regarding this study  
373 may be obtained by contacting Brendan Nyhan at nyhan@dartmouth.edu.  
374

375 Whom can I speak with? The Committee for the Protection of Human Subjects at Dartmouth College, which can be reached  
376 at (603) 646-6482, can provide information about your rights as a research participant. You may also contact this office if  
377 you have questions, concerns, or complaints about the research, or wish to speak with someone independent of the research  
378 team. If you wish to provide a written signature to signal your consent, please contact Brendan Nyhan at the email address above.  
379

380 Do you consent to participate in the study?

381 -Yes

382 -No  
383

384 We would like you to examine some messages that President Trump posted on Twitter.  
385

386 [*Twenty total tweets were shown across four screens, with five tweets per page. See full list of tweets included by treatment*  
387 *condition.*]  
388

389 Thinking about the tweets you just saw, how much do you feel:  
390

391 Angry

392 -Very (4)

393 -Somewhat (3)

394 -A little (2)

395 -Not at all (1)  
396

397 Outraged

398 -Very (4)

399 -Somewhat (3)

400 -A little (2)

401 -Not at all (1)  
402

403 Anxious

404 -Very (4)

405 -Somewhat (3)

406 -A little (2)

407 -Not at all (1)  
408

409 Afraid

410 -Very (4)

411 -Somewhat (3)

412 -A little (2)

413 -Not at all (1)  
414

415 Enthusiastic

416 -Very (4)



417 -Somewhat (3)  
418 -A little (2)  
419 -Not at all (1)

420  
421 Happy  
422 -Very (4)  
423 -Somewhat (3)  
424 -A little (2)  
425 -Not at all (1)

426  
427 How much do you agree or disagree with each of the following statements?

428  
429 An important part of democracy is to accept election losses peacefully.

430 -Strongly agree (6)  
431 -Somewhat agree (5)  
432 -Slightly agree (4)  
433 -Slightly disagree (3)  
434 -Somewhat disagree (2)  
435 -Strongly disagree (1)

436  
437 Elections in the United States are rigged in favor of [Democrats (*if respondent identifies or leans Republican*) / Republicans (*if*  
438 *respondent identifies or leans Democrat*); party names randomized if respondent does not identify with or lean toward either  
439 party].

440 -Strongly agree (6)  
441 -Somewhat agree (5)  
442 -Slightly agree (4)  
443 -Slightly disagree (3)  
444 -Somewhat disagree (2)  
445 -Strongly disagree (1)

446  
447 Sometimes regular people need to be a little violent to make sure votes are counted correctly.

448 -Strongly agree (6)  
449 -Somewhat agree (5)  
450 -Slightly agree (4)  
451 -Slightly disagree (3)  
452 -Somewhat disagree (2)  
453 -Strongly disagree (1)

454  
455 Next, we'd like you to think not about 2020, but about the the past fifty years or so. How accurate is each of the following  
456 statements in describing how things generally work in American politics?

457 Presidential candidates accept the outcome of elections even if they narrowly lose.

458 -Very accurate (4)  
459 -Somewhat accurate (3)  
460 -Not very accurate (2)  
461 -Not at all accurate (1)

462  
463 Presidents do their best to unify the country by downplaying divisions.

464 -Very accurate (4)  
465 -Somewhat accurate (3)  
466 -Not very accurate (2)  
467 -Not at all accurate (1)

468  
469 Presidents hold meetings or speak on the phone with leaders of other countries to discuss foreign policy and global issues.

470 -Very accurate (4)  
471 -Somewhat accurate (3)  
472 -Not very accurate (2)  
473 -Not at all accurate (1)

474  
475 Presidents make sure to visit all national parks every year.

476 -Very accurate (4)  
477 -Somewhat accurate (3)

478 -Not very accurate (2)  
479 -Not at all accurate (1)

480  
481 How much do you agree or disagree with the following statement? [paragraph break] Presidential candidates should accept the  
482 outcome of elections even if they narrowly lose.

483 -Strongly agree (6)  
484 -Somewhat agree (5)  
485 -Slightly agree (4)  
486 -Slightly disagree (3)  
487 -Somewhat disagree (2)  
488 -Strongly disagree (1)

489  
490 Please indicate what percentage of Americans you think would agree with the following statement. If you think every American  
491 would agree, enter 100. If you think no one would agree, enter 0. If you think half of Americans would agree, enter 50. You can  
492 enter any number from 0-100. [paragraph break] What percentage of the public do you think would agree with the following  
493 statement? Presidential candidates should accept the outcome of elections even if they narrowly lose.  
494 -Value entry, 0-100.

495  
496 To what extent do you trust elections in this country? Please respond on the scale below where 1 means “not at all” and 7  
497 means “a lot.”

498 -1 (Not at all)  
499 -2  
500 -3  
501 -4  
502 -5  
503 -6  
504 -7 (A lot)

505  
506 How confident are you that votes nationwide will be counted as intended in this year’s election?

507 -Very confident (4)  
508 -Somewhat confident (3)  
509 -Not too confident (2)  
510 -Not at all confident (1)

511  
512 How confident are you that election officials will manage the counting of ballots fairly in the election this November?

513 -Very confident (4)  
514 -Somewhat confident (3)  
515 -Not too confident (2)  
516 -Not at all confident (1)

517  
518 Please think again about the statements by President Trump that you read a minute ago. Setting aside how you feel about  
519 Trump or his views, would you say that these statements follow or depart from past practices by American presidents?

520 -Entirely follow past practice (4)  
521 -Mostly follow past practice (3)  
522 -Mostly depart from past practice (2)  
523 -Entirely depart from past practice (1)

524  
525 Which topic came up most frequently in the Donald Trump tweets you just read?

526 -His views about the election (1)  
527 -His views about immigration (0)  
528 -His views about police protests (0)  
529 -His views about health care (0)  
530 -His views about climate change (0)  
531 -His views about defense policy (0)

532  
533 Do you have any comments on the survey? Please let us know about any problems you had or aspects of the survey that were  
534 confusing.

535 [optional text entry]

536  
537 Thank you for answering these questions and for your participation. Please do not share any information about the nature of  
538 this study with other potential participants. This research is not intended to support or oppose any political candidate or

539 office. The research has no affiliation with any political candidate or campaign and has received no financial support from any  
540 political candidate or campaign. We may contact you to invite you to follow-up studies. Your participation in any follow-up  
541 studies is entirely voluntary and will not affect your compensation for this study. Should you have any questions about this  
542 study, please contact Brendan Nyhan at nyhan@dartmouth.edu.  
543

544 **wave 4 questionnaire.** This study is being conducted by Katie Clayton of Stanford University, Nicholas Davis of the University  
545 of Alabama, Brendan Nyhan of Dartmouth College, Ethan Porter of George Washington University, Timothy Ryan of the  
546 University of North Carolina at Chapel Hill, and Thomas J. Wood of the Ohio State University. Your participation is  
547 voluntary and you may decline to participate in the survey or withdraw at any time. No information that identifies you  
548 will be collected or retained by the researchers. However, any online interaction carries some risk of being accessed. The  
549 survey will take about 3 to 5 minutes to complete. The purpose of the study is to better understand the determinants of  
550 attitudes about major public challenges. Possible benefits of participation include having the opportunity to express your  
551 opinion about issues of public concern. Possible risks or discomforts you could experience during this study include breach  
552 of confidentiality and boredom. If you experience any research-related injury, you should contact the Principal Investigator  
553 immediately. Further information regarding this study may be obtained by contacting Brendan Nyhan at nyhan@dartmouth.edu.  
554

555 Whom can I speak with? The Committee for the Protection of Human Subjects at Dartmouth College, which can be reached  
556 at (603) 646-6482, can provide information about your rights as a research participant. You may also contact this office if  
557 you have questions, concerns, or complaints about the research, or wish to speak with someone independent of the research  
558 team. If you wish to provide a written signature to signal your consent, please contact Brendan Nyhan at the email address above.  
559

560 Do you consent to participate in the study?

561 -Yes

562 -No

563

564 How much do you agree or disagree with each of the following statements?

565

566 An important part of democracy is to accept election losses peacefully.

567 -Strongly agree (6)

568 -Somewhat agree (5)

569 -Slightly agree (4)

570 -Slightly disagree (3)

571 -Somewhat disagree (2)

572 -Strongly disagree (1)

573

574 Elections in the United States are rigged in favor of [Democrats (*if respondent identifies or leans Republican*) / Republicans (*if*  
575 *respondent identifies or leans Democrat*); party names randomized if respondent does not identify with or lean toward either  
576 party].

577 -Strongly agree (6)

578 -Somewhat agree (5)

579 -Slightly agree (4)

580 -Slightly disagree (3)

581 -Somewhat disagree (2)

582 -Strongly disagree (1)

583

584 Sometimes regular people need to be a little violent to make sure votes are counted correctly.

585 -Strongly agree (6)

586 -Somewhat agree (5)

587 -Slightly agree (4)

588 -Slightly disagree (3)

589 -Somewhat disagree (2)

590 -Strongly disagree (1)

591

592 Next, we'd like you to think not about 2020, but about the the past fifty years or so. How accurate is each of the following  
593 statements in describing how things generally work in American politics?

594

595 Presidential candidates accept the outcome of elections even if they narrowly lose.

596 -Very accurate (4)

597 -Somewhat accurate (3)

598 -Not very accurate (2)

599 -Not at all accurate (1)

600

601 Presidents do their best to unify the country by downplaying divisions.

602 -Very accurate (4)

603 -Somewhat accurate (3)

604 -Not very accurate (2)

605 -Not at all accurate (1)

606

607 Presidents hold meetings or speak on the phone with leaders of other countries to discuss foreign policy and global issues.

608 -Very accurate (4)

609 -Somewhat accurate (3)

610 -Not very accurate (2)

611 -Not at all accurate (1)

612

613 Presidents make sure to visit all national parks every year.

614 -Very accurate (4)

615 -Somewhat accurate (3)

616 -Not very accurate (2)

617 -Not at all accurate (1)

618

619 How much do you agree or disagree with the following statement? *[paragraph break]* Presidential candidates should accept the  
620 outcome of elections even if they narrowly lose.

621 -Strongly agree (6)

622 -Somewhat agree (5)

623 -Slightly agree (4)

624 -Slightly disagree (3)

625 -Somewhat disagree (2)

626 -Strongly disagree (1)

627

628 Please indicate what percentage of Americans you think would agree with the following statement. If you think every American  
629 would agree, enter 100. If you think no one would agree, enter 0. If you think half of Americans would agree, enter 50. You can  
630 enter any number from 0-100. *[paragraph break]* What percentage of the public do you think would agree with the following  
631 statement? Presidential candidates should accept the outcome of elections even if they narrowly lose.

632 - *Value entry, 0-100.*

633

634 To what extent do you trust elections in this country? Please respond on the scale below where 1 means “not at all” and 7  
635 means “a lot.”

636 -1 (Not at all)

637 -2

638 -3

639 -4

640 -5

641 -6

642 -7 (A lot)

643

644 How confident are you that votes nationwide will be counted as intended in this year’s election?

645 -Very confident (4)

646 -Somewhat confident (3)

647 -Not too confident (2)

648 -Not at all confident (1)

649

650 How confident are you that election officials will manage the counting of ballots fairly in the election this November?

651 -Very confident (4)

652 -Somewhat confident (3)

653 -Not too confident (2)

654 -Not at all confident (1)

655

656 To the best of your knowledge, how many times does each of these occur in a presidential election?

657 Voting more than once

658 -A million or more (7)

659 -Hundreds of thousands (6)

- 660 -Tens of thousands (5)
- 661 -Thousands (4)
- 662 -Hundreds (3)
- 663 -Less than a hundred (2)
- 664 -Less than ten (1)

665  
666 Stealing or tampering with ballots

- 667 -A million or more (7)
- 668 -Hundreds of thousands (6)
- 669 -Tens of thousands (5)
- 670 -Thousands (4)
- 671 -Hundreds (3)
- 672 -Less than a hundred (2)
- 673 -Less than ten (1)

674  
675 Pretending to be someone else when voting

- 676 -A million or more (7)
- 677 -Hundreds of thousands (6)
- 678 -Tens of thousands (5)
- 679 -Thousands (4)
- 680 -Hundreds (3)
- 681 -Less than a hundred (2)
- 682 -Less than ten (1)

683  
684 People voting who are not U.S. citizens

- 685 -A million or more (7)
- 686 -Hundreds of thousands (6)
- 687 -Tens of thousands (5)
- 688 -Thousands (4)
- 689 -Hundreds (3)
- 690 -Less than a hundred (2)
- 691 -Less than ten (1)

692  
693 Voting with an absentee ballot intended for another person

- 694 -A million or more (7)
- 695 -Hundreds of thousands (6)
- 696 -Tens of thousands (5)
- 697 -Thousands (4)
- 698 -Hundreds (3)
- 699 -Less than a hundred (2)
- 700 -Less than ten (1)

701  
702 When, if ever, is it OK for [respondent party (including leaners); randomized if respondent does not identify with or lean  
703 toward either party] to send threatening and intimidating messages to [other party] leaders?

- 704 -Always (4)
- 705 -Frequently (3)
- 706 -Occasionally (2)
- 707 -Never (1)

708  
709 When, if ever, is it OK for an ordinary [respondent party (including leaners); randomized if respondent does not identify with  
710 or lean toward either party] in the public to harass an ordinary [other party] on the Internet, in a way that makes the [other  
711 party] feel unsafe?

- 712 -Always (4)
- 713 -Frequently (3)
- 714 -Occasionally (2)
- 715 -Never (1)

716  
717 How much do you feel it is justified for [respondent party (including leaners); randomized if respondent does not identify with  
718 or lean toward either party] to use violence in advancing their political goals these days?

- 719 -Always (4)
- 720 -Frequently (3)

721 -Occasionally (2)

722 -Never (1)

723

724 What if the [other party; randomized if respondent does not identify with or lean toward either party] win the 2020 presidential  
725 election? How much do you feel violence would be justified then?

726 -Always (4)

727 -Frequently (3)

728 -Occasionally (2)

729 -Never (1)

730

731 Various types of political systems are described below. Please think about each choice in terms of governing this country and  
732 indicate if you think that it would be a very good, fairly good, fairly bad or very bad way of governing the United States.

733

734 Having a strong leader who does not have to bother with Congress and elections

735 -Very good (4)

736 -Fairly good (3)

737 -Fairly bad (2)

738 -Very bad (1)

739

740 Having experts, not government, make decisions according to what they think is best for the country

741 -Very good (4)

742 -Fairly good (3)

743 -Fairly bad (2)

744 -Very bad (1)

745 Having the army rule

746 -Very good (4)

747 -Fairly good (3)

748 -Fairly bad (2)

749 -Very bad (1)

750

751 Having a democratic political system

752 -Very good (4)

753 -Fairly good (3)

754 -Fairly bad (2)

755 -Very bad (1)

756

757 In talking to people about elections, we often find out that a lot of people aren't able to vote because they were not registered,  
758 or they were sick, or they just didn't have time. How about you – how likely are you to vote in the general election this  
759 November?

760 -Definitely will vote (4)

761 -Probably will vote (3)

762 -Probably will not vote (2)

763 -Definitely will not vote (1)

764 -Already voted by mail (5)

765 -Already voted in person (5)

766

767 If you were casting a vote today in the 2020 presidential election, for whom would you vote for President of the United States?

768 -Joe Biden (Democrat) (1)

769 -Donald Trump (Republican) (2)

770 -Another candidate/neither (3)

771

772 Next, we would like you to examine some messages that President Trump posted on Twitter.

773

774 [*Four total tweets were shown. See full list of tweets included by treatment condition.*]

775

776 Thinking about the tweets you just saw, how much do you feel:

777

778 Angry

779 -Very (4)

780 -Somewhat (3)

781 -A little (2)

782 -Not at all (1)

783

784 Outraged

785 -Very (4)

786 -Somewhat (3)

787 -A little (2)

788 -Not at all (1)

789

790 Anxious

791 -Very (4)

792 -Somewhat (3)

793 -A little (2)

794 -Not at all (1)

795

796 Afraid

797 -Very (4)

798 -Somewhat (3)

799 -A little (2)

800 -Not at all (1)

801

802 Enthusiastic

803 -Very (4)

804 -Somewhat (3)

805 -A little (2)

806 -Not at all (1)

807

808 Happy

809 -Very (4)

810 -Somewhat (3)

811 -A little (2)

812 -Not at all (1)

813

814 Do you have any comments on the survey? Please let us know about any problems you had or aspects of the survey that were  
815 confusing.

816 [optional text entry]

817

818 Thank you for answering these questions and for your participation. Please do not share any information about the nature of  
819 this study with other potential participants. This research is not intended to support or oppose any political candidate or  
820 office. The research has no affiliation with any political candidate or campaign and has received no financial support from any  
821 political candidate or campaign. We may contact you to invite you to follow-up studies. Your participation in any follow-up  
822 studies is entirely voluntary and will not affect your compensation for this study. Should you have any questions about this  
823 study, please contact Brendan Nyhan at nyhan@dartmouth.edu.

824

**Tweet selection process.** We selected our treatment materials (tweets from President Trump) using the process described below. For tweets that do not breach political norms, we used the Trump Twitter Archive (<http://www.trumptwitterarchive.com/archive>) to search all tweets by Donald Trump. We restricted our collection period to 2020 only and selected 118 tweets that did not obviously seem to violate democratic norms (that is, tweets that did not involve transgressing traditional standards of public communication by elected leaders). These tweets involve mostly innocuous communication about places, events, and policy announcements. Additional criteria for these tweets included: 1) they were not retweets, 2) were neither in a thread nor were first in a thread that made little contextual sense without including other tweets in the thread, and 3) did not include quoted or media content (or make contextual sense with that content omitted). Examples of tweets that seemingly do not breach political norms include: (1) “We just landed Wisconsin a massive Navy shipbuilding contract. Beautiful designs!”, (2) “My Administration is closely monitoring Hurricane Douglas off Hawaii & Hurricane Hanna, which has now made landfall in Texas. We continue to coordinate closely with both states – listen to your emergency management officials @Hawaii\_EMA & @TDEM to protect your family & property!”, and (3) “White House News Conference today at 5:30 P.M. Enjoy!”

To further refine this selection process, we then ran a pretest of the potential tweets selected using the process defined here among 1,851 respondents on Lucid who passed an attention check to examine whether independent coders view the tweets as following or departing from past practices by American presidents. Participants rated each tweet on a four-point scale, where 1 is “entirely follows past practices,” 2 is “mostly follows past practices,” 3 is “mostly departs from past practices,” and 4 is “entirely departs from past practices.” The pretest also asked respondents if the topic of the tweet involved U.S. elections specifically or something else to ensure that the placebo content was unrelated to elections, the subject of tweets in another condition (see below). We retained the 44 tweets with the lowest scores on the past practices metric among those for which fewer than 40% of pretest respondents indicated that U.S. elections are the specific topic of the tweet. The resulting group of tweets are those that are seen as maximally consistent with past practices and not closely related to elections. The mean rating on the past practices scale for this group of tweets (on the 1–4 scale) is 2.00.

For tweets that breach political norms but were not focused on elections, we relied on events that Bright Line Watch experts have rated as abnormal and important in their quarterly expert surveys. Again, we searched the Trump Twitter Archive using keywords contained in those events for tweets from 2019 and 2020. We selected 40 tweets using this approach with the same criteria regarding retweets, threads, and media as described above. Examples of tweets that seem to breach political norms but are not focused on elections include: (1) “Ted Wheeler, the wacky Radical Left Do Nothing Democrat Mayor of Portland, who has watched great death and destruction of his City during his tenure, thinks this lawless situation should go on forever. Wrong! Portland will never recover with a fool for a Mayor..”, (2) “The press is doing everything within their power to fight the magnificence of the phrase, MAKE AMERICA GREAT AGAIN! They can’t stand the fact that this Administration has done more than virtually any other Administration in its first 2yrs. They are truly the ENEMY OF THE PEOPLE!”, and (3) “I was criticized by the Democrats when I closed the Country down to China many weeks ahead of what almost everyone recommended. Saved many lives. Dems were working the Impeachment Hoax. They didn’t have a clue! Now they are fear mongering. Be calm & vigilant!” We pretested these on Lucid as part of the  $n = 1,851$  data collection described above and retained the 20 tweets with the highest scores on the past practices metric among those for which fewer than 40% of pretest respondents indicated that U.S. elections are the specific topic of the tweet. The resulting group of tweets are those that are seen as maximally departing from past practices and not closely related to elections. The mean rating on the past practices scale for this group of tweets (on the 1–4 scale) is 3.14. While the norm-violating tweets were not specifically rated for their valence (positive/negative), they are by design generally more negative than the non-norm-violating tweets because norm violations often involve attacks on people or political processes.

Finally, for tweets that breach political norms and involve elections, we focused only on tweets involving the 2020 presidential election. Our collection protocol for these tweets relied on lists provided to us by the *Wall Street Journal* and the website [Factba.se](https://factba.se) (1, 2). Each list was a compilation of tweets sent by President Trump that seemed to undermine faith in American elections. We collected all tweets from 2020 in these lists using the same criteria regarding retweets, threads, and media described above. Since each list was provided to us a few weeks before our pretest and to ensure that the lists covered all relevant tweets, we also performed a keyword search in the Trump Twitter Archive using the keywords “election,” “ballot,” and “vote” and collected tweets from 2020 that violate or allege violations of one or more of the following Bright Line Watch democratic norms related to elections (3): (1) Elections are conducted, ballots counted, and winners determined without pervasive fraud or manipulation, (2) The geographic boundaries of electoral districts do not systematically advantage any particular political party, (3) Elections are free from foreign influence, (4) All adult citizens have equal opportunity to vote, (5) All votes have equal impact on election outcomes, (6) Voter participation in elections is generally high.

We selected 56 tweets using this approach. Examples of tweets that seemingly breach political norms and are focused on elections include: (1) “The Democrats know the 2020 Election will be a fraudulent mess. Will maybe never know who won!”, (2) “Mail-In Ballot fraud found in many elections. People are just now seeing how bad, dishonest and slow it is. Election results could be delayed for months. No more big election night answers? 1% not even counted in 2016. Ridiculous! Just a formula for RIGGING an Election...”, and (3) “Rigged Election, and EVERYONE knows it!” We pretested these as part of the same  $n = 1,851$  Lucid data collection described above and retained the 24 tweets with the highest scores on the past practices metric among those for which more than 60% of pretest respondents indicated that U.S. elections are the specific topic of the tweet. The resulting group of tweets are those that are seen as maximally departing from past practices and very closely related to elections. The mean rating on the past practices scale for this group of tweets (on the 1–4 scale) is 3.14.

After this initial pretest, we sought to address concern that the placebo tweets above might differ from those in the election



886 norm violations treatment condition on two dimensions. We thus followed a process like the one described above to select  
887 47 election-related tweets that did not obviously seem to violate democratic norms (that is, tweets that did not involve  
888 transgressing traditional standards of public communication by elected leaders). Examples of such tweets include: (1) “Chris  
889 Jacobs will be a great Congressman who will always fight for the people of New York. He supports our #MAGA Agenda, will  
890 continue to Secure Our Border, Loves our Military, Vets, and is Strong on the #2A. Chris has my Complete Endorsement for  
891 the Special Election on 4/28!”, (2) “Thank you to the Republican National Committee, (the RNC), who voted UNANIMOUSLY  
892 yesterday to support me in the upcoming 2020 Election. Considering that we have done more than any Administration in the  
893 first two years, this should be easy. More great things now in the works!”, and (3) “Just landed in New York to see my brother,  
894 Robert. We’re going for New York on November 3rd. We’re going to Reduce Taxes, Increase Law Enforcement, and bring it  
895 back BIG TIME! #MAGA.” We then separately tested these tweets (along with the  $44 + 20 + 24 = 88$  tweets that we had  
896 already selected using the process previously described to induce wider variance in both election content and normalcy) in a  
897 pretest of 1,417 respondents on Lucid using the questions above. We selected the 20 tweets with the lowest scores on the past  
898 practices metric among those for which more than 60% of pretest respondents indicated that “U.S. elections” are the specific  
899 topic of the tweet (rather than “some other topic”). The resulting group of tweets includes those that are seen as maximally  
900 consistent with past practices and closely related to elections. The mean rating on the past practices scale for this group of  
901 tweets (on the 1–4 scale) is 2.26.

902 This pretest of 261 candidate tweets across the four experimental conditions resulted in the following final treatment stimuli:  
903 40 tweets that do not violate democratic norms and are not closely related to elections, 20 tweets that do not violate democratic  
904 norms and are focused on elections, 20 tweets that breach political norms but are not focused on elections, and 20 tweets that  
905 breach political norms and are focused on elections. We used a brute force randomization technique to partition each group of  
906 qualifying tweets into all possible groups of the relevant sizes, compared group differences in mean normalcy within tweet type,  
907 and chose the partitioning rules that minimize these differences to decide which tweets of each type go into each wave. The  
908 final list of tweets by treatment condition and survey wave is shown in Table [SI-1](#).

Table SI-1. Treatment materials

| Wave | Group                             | Tweet text                                                                                                                                                                                                                                                                             |
|------|-----------------------------------|----------------------------------------------------------------------------------------------------------------------------------------------------------------------------------------------------------------------------------------------------------------------------------------|
| 1    | Non-election placebo (all groups) | It has been two years since the tragedy in Parkland. We will always mourn the innocent lives taken from us – 14 wonderful students and 3 terrific educators. Earlier this week, I met with families whose experiences from that horrible day still pierce the soul...                  |
| 1    | Non-election placebo (all groups) | On #NationalDoctorsDay, we recognize the remarkable men & women who treat their fellow Americans, find cures for the diseases & illnesses we face, and never waver in their efforts to treat every patient with the dignity, respect, and empathy they deserve.                        |
| 1    | Non-election placebo (all groups) | I am proud to announce the first \$500M of \$3.9B in CARES Act transit funding headed to the NY Metropolitan Transportation Authority. Important funding to keep transit systems clean and operating to get people back to work! Spend it wisely! @NYGovCuomo @NYCMayor                |
| 1    | Non-election placebo (all groups) | \$13.9M is heading to New Orleans in @USDOT funding for @NewOrleansRTA! Happy to support bus service and major fleet improvements for the great people of Louisiana and help them keep moving safely.                                                                                  |
| 2    | Non-election placebo (all groups) | One of the many great things about our just signed giant Trade Deal with China is that it will bring both the USA & China closer together in so many other ways. Terrific working with President Xi, a man who truly loves his country. Much more to come!                             |
| 2    | Non-election placebo (all groups) | It was my honor to welcome our nation's Mayors to the @WhiteHouse as we continue to strengthen the bonds of cooperation between federal and local governments so that we can deliver great jobs, excellent schools, affordable healthcare, and safe communities for all of our people! |
| 2    | Non-election placebo (all groups) | Welcome back to Earth, @Astro_Christina, and congratulations on breaking the female record for the longest stay in space! You're inspiring young women and making the USA proud! Enjoyed speaking with you and @Astro_Jessica on the first all-female spacewalk IN HISTORY last year.  |
| 2    | Non-election placebo (all groups) | I want to thank all of our Great Government officials on the CoronaVirus Task Force who are working around the clock, in response to the CoronaVirus. Continue to check <a href="http://CDC.gov">http://CDC.gov</a> for updates, and follow all recommendations that are available...  |
| 2    | Non-election placebo (all groups) | Good teamwork between Republicans & Democrats as the House passes the big CoronaVirus Relief Bill. People really pulled together. Nice to see!                                                                                                                                         |
| 2    | Non-election placebo (all groups) | I ask all Americans to band together and support your neighbors by not hoarding unnecessary amounts of food and essentials. TOGETHER we will stay STRONG and overcome this challenge!                                                                                                  |
| 2    | Non-election placebo (all groups) | Great meeting today with the CoronaVirus Task Force in the Oval Office. Stay informed at: <a href="http://CoronaVirus.gov">http://CoronaVirus.gov</a> .                                                                                                                                |

Continued on next page

Table SI-1 – continued from previous page

| Wave | Group                             | Tweet text                                                                                                                                                                                                                                                                             |
|------|-----------------------------------|----------------------------------------------------------------------------------------------------------------------------------------------------------------------------------------------------------------------------------------------------------------------------------------|
| 2    | Non-election placebo (all groups) | Hurricane Laura is a very dangerous and rapidly intensifying hurricane. My Administration remains fully engaged with state & local emergency managers to continue preparing and assisting the great people Texas, Louisiana, and Arkansas. Listen to local officials. We are with you! |
| 2    | Non-election placebo (all groups) | I was saddened to learn of the passing of India’s former President, Pranab Mukherjee. I send my condolences to his family and the people of India as they grieve the loss of a great leader.                                                                                           |
| 2    | Non-election placebo (all groups) | Today I spoke with our Nation’s Small Businesses, which employ nearly half of America’s workforce. We are taking the MOST aggressive action in history to deliver fast relief to your businesses and workers. We will always protect our Small Businesses! @SBAGov                     |
| 2    | Non-election placebo              | Kobe Bryant, despite being one of the truly great basketball players of all time, was just getting started in life. He loved his family so much, and had such strong passion for the future. The loss of his beautiful daughter, Gianna, makes this moment even more devastating...    |
| 2    | Non-election placebo              | Jack Welch, former Chairman and CEO of GE, a business legend, has died. There was no corporate leader like “neutron” Jack. He was my friend and supporter. We made wonderful deals together. He will never be forgotten. My warmest sympathies to his wonderful wife & family!         |
| 2    | Non-election placebo              | THANK YOU to our Police Officers, Fire Fighters, and EMS who help us defeat the Virus every day. Our proud nation is grateful for the unwavering dedication and sacrifice of our First Responders and their families. TOGETHER we will beat this!                                      |
| 2    | Non-election placebo              | Congratulations to Prime Minister Abe of Japan, and the IOC, on their very wise decision to present the Olympics in 2021. It will be a great success, and I look forward to being there!                                                                                               |
| 2    | Non-election placebo              | Great News: Prime Minister Boris Johnson has just been moved out of Intensive Care. Get well Boris!!!                                                                                                                                                                                  |
| 2    | Non-election placebo              | Extraordinary rescue yesterday by our brave and “Semper Paratus” U.S. Coast Guard. Our rapid response and the vessel’s survival equipment allowed these four mariners to see their loved ones again. Well done @USCG!                                                                  |
| 2    | Non-election placebo              | We will miss GREAT Country Rocker, Charlie Daniels, who passed away yesterday in Hermitage, Tennessee. My condolences to his wife Hazel, and their family. Charlie is in my thoughts and prayers. I love his music! #RIPCharlieDaniels                                                 |
| 2    | Non-election placebo              | Saddened to hear the news of civil rights hero John Lewis passing. Melania and I send our prayers to he and his family.                                                                                                                                                                |
| 2    | Non-election placebo              | We MUST protect our National Parks for our children and grandchildren. I am calling on the House to pass the GREAT AMERICAN OUTDOORS ACT today. Thanks @SenCoryGardner and @SteveDaines for all your work on this HISTORIC BILL!                                                       |

Continued on next page

Table SI-1 – continued from previous page

| Wave | Group                   | Tweet text                                                                                                                                                                                                                                                                               |
|------|-------------------------|------------------------------------------------------------------------------------------------------------------------------------------------------------------------------------------------------------------------------------------------------------------------------------------|
| 2    | Non-election placebo    | Today, we honor the brave Native American/First Nations soldiers who served our Nation and played a vital role in America's victory in WWII. The Navajo Code was never broken and saved untold American lives. Our country will be forever grateful. Happy Navajo Code Talkers Day!      |
| 2    | Election placebo        | Chris Jacobs will be a great Congressman who will always fight for the people of New York. He supports our #MAGA Agenda, will continue to Secure Our Border, Loves our Military, Vets, and is Strong on the #2A. Chris has my Complete Endorsement for the Special Election on 4/28!     |
| 2    | Election placebo        | Volunteer to be a Trump Election Poll Watcher. Sign up today! #MakeAmericaGreatAgain                                                                                                                                                                                                     |
| 2    | Election placebo        | Great Rally in Pennsylvania last night. Congressman Lloyd Smucker (PA-11) was there and I informed him that he has my complete and total Endorsement for the upcoming 2020 Election. Lloyd has done a great job. I am with him all the way! #MAGA                                        |
| 2    | Election placebo        | I hope everyone in the Great State of Virginia will get out and VOTE on Tuesday in all of the local and state elections to send a signal to D.C. that you want lower taxes, a strong Military, Border & 2nd Amendment, great healthcare, and must take care of our Vets. VOTE REPUBLICAN |
| 2    | Election placebo        | No debate on Election Security should go forward without first agreeing that Voter ID (Identification) must play a very strong part in any final agreement. Without Voter ID, it is all so meaningless!                                                                                  |
| 2    | Election placebo        | I will be in Gulfport and Tupelo, Mississippi, on Monday night doing two Rallies for Senator Hyde-Smith, who has a very important Election on Tuesday. She is an outstanding person who is strong on the Border, Crime, Military, our great Vets, Healthcare & the 2nd A. Needed in D.C. |
| 2    | Election placebo        | Republicans, get out and vote today for those great candidates that will lead to big victories on November 3rd. MAKE AMERICA GREAT AGAIN!                                                                                                                                                |
| 2    | Election placebo        | Just landed in New York to see my brother, Robert. We're going for New York on November 3rd. We're going to Reduce Taxes, Increase Law Enforcement, and bring it back BIG TIME! #MAGA                                                                                                    |
| 2    | Election placebo        | Such a fantastic win for Ron DeSantis and the people of the Great State of Florida. Ron will be a fantastic Governor. On to November!                                                                                                                                                    |
| 2    | Election placebo        | Last day to register to VOTE in Alabama, California, South Dakota and Wyoming! #JobsNotMobs <a href="http://Vote.GOP">http://Vote.GOP</a>                                                                                                                                                |
| 2    | General norm violations | They are not "peaceful protesters", as Sleepy Joe and the Democrats call them, they are THUGS – And it is all taking place in Democrat run cities. Call me and request Federal HELP. We will solve your problems in a matter of minutes – And thanks to the U.S. Marshalls in Portland!  |

Continued on next page

Table SI-1 – continued from previous page

| Wave | Group                    | Tweet text                                                                                                                                                                                                                                                                               |
|------|--------------------------|------------------------------------------------------------------------------------------------------------------------------------------------------------------------------------------------------------------------------------------------------------------------------------------|
| 2    | General norm violations  | If I didn't demand that National Guard Troops go into Minneapolis after watching how poorly the Liberal Democrat government was handling things, you wouldn't even have a Minneapolis now. Once they were deployed, in force, all looting, burning and crime stopped DEAD!               |
| 2    | General norm violations  | @PeteHegseth "Oh bye the way, I appreciate the message from former President Bush, but where was he during Impeachment calling for putting partisanship aside." @foxandfriends He was nowhere to be found in speaking up against the greatest Hoax in American history!                  |
| 2    | General norm violations  | Does anybody really believe that Roger Stone, a man whose house was raided early in the morning by 29 gun toting FBI Agents (with Fake News @CNN closely in toe), was treated fairly. How about the jury forewoman with her unannounced hatred & bias. Same scammers as General Flynn!   |
| 2    | General norm violations  | This is what happens to someone who loyally gets appointed Attorney General of the United States & then doesn't have the wisdom or courage to stare down & end the phony Russia Witch Hunt. Recuses himself on FIRST DAY in office, and the Mueller Scam begins!                         |
| 2    | General norm violations  | Shifty Adam Schiff is a CORRUPT POLITICIAN, and probably a very sick man. He has not paid the price, yet, for what he has done to our Country!                                                                                                                                           |
| 2    | General norm violations  | The News Reports about the Department of Commerce dropping its quest to put the Citizenship Question on the Census is incorrect or, to state it differently, FAKE! We are absolutely moving forward, as we must, because of the importance of the answer to this question.               |
| 2    | General norm violations  | Nancy Pelosi knew of all of the many Shifty Adam Schiff lies and massive frauds perpetrated upon Congress and the American people, in the form of a fraudulent speech knowingly delivered as a ruthless con, and the illegal meetings with a highly partisan "Whistleblower" & lawyer... |
| 2    | General norm violations  | PM Justin Trudeau of Canada acted so meek and mild during our @G7 meetings only to give a news conference after I left saying that, "US Tariffs were kind of insulting" and he "will not be pushed around." Very dishonest & weak. Our Tariffs are in response to his of 270% on dairy!  |
| 2    | General norm violations  | THE RIGGED AND CORRUPT MEDIA IS THE ENEMY OF THE PEOPLE!                                                                                                                                                                                                                                 |
| 2    | Election norm violations | It is happening again to Crazy Bernie, just like last time, only far more obvious. They are taking the Democrat Nomination away from him, and there's very little he can do. A Rigged System!                                                                                            |
| 2    | Election norm violations | So in California, the Democrats, who fought like crazy to get all mail in only ballots, and succeeded, have just opened a voting booth in the most Democrat area in the State. They are trying to steal another election. It's all rigged out there. These votes must not count. SCAM!   |

Continued on next page

Table SI-1 – continued from previous page

| Wave | Group                             | Tweet text                                                                                                                                                                                                                                                                            |
|------|-----------------------------------|---------------------------------------------------------------------------------------------------------------------------------------------------------------------------------------------------------------------------------------------------------------------------------------|
| 2    | Election norm violations          | So ridiculous to see Twitter trying to make the case that Mail-In Ballots are not subject to FRAUD. How stupid, there are examples, & cases, all over the place. Our election process will become badly tainted & a laughingstock all over the World. Tell that to your hater @yoyoel |
| 2    | Election norm violations          | Because of MAIL-IN BALLOTS, 2020 will be the most RIGGED Election in our nations history – unless this stupidity is ended. We voted during World War One & World War Two with no problem, but now they are using Covid in order to cheat by using Mail-Ins!                           |
| 2    | Election norm violations          | Mail-In Ballot fraud found in many elections. People are just now seeing how bad, dishonest and slow it is. Election results could be delayed for months. No more big election night answers? 1% not even counted in 2016. Ridiculous! Just a formula for RIGGING an Election...      |
| 2    | Election norm violations          | Glad I was able to get the very dishonest LameStream Media to finally start talking about the RISKS to our Democracy from dangerous Universal Mail-In-Voting (not Absentee Voting, which I totally support!).                                                                         |
| 2    | Election norm violations          | The Democrats are demanding Mail-In Ballots because the enthusiasm meter for Slow Joe Biden is the lowest in recorded history, and they are concerned that very few people will turn out to vote. Instead, they will search & find people, then “harvest” & return Ballots. Not fair! |
| 2    | Election norm violations          | The greatest Election Fraud in our history is about to happen. This may top the Democrats illegally spying on my campaign!                                                                                                                                                            |
| 2    | Election norm violations          | All the Radical Left Democrats are trying to do with the Post Office hearings is blame the Republicans for the FRAUD that will occur because of the 51 Million Ballots that are being sent to people who have not even requested them. They are setting the table for a BIG MESS!     |
| 2    | Election norm violations          | For our Country to be sending 80 million UNSOLICITED BALLOTS is very unfair and a roadmap to disaster. Even recent small and easier to control elections which did this are a catastrophic disaster. Fraudulent & missing Ballots like never seen before. 20% and 30% off. STOP!      |
| 3    | Non-election placebo (all groups) | Today I spoke with American physicians and nurses to thank them for their tireless work. Doctors and nurses are at the front lines of this war and are true American HEROES! With their help, America will WIN.                                                                       |
| 3    | Non-election placebo (all groups) | America owes our very hard working food supply workers so much as they produce and deliver high quality food for us during this horrible COVID-19. Join me in thanking our Farmers, Ranchers, Processors, Distributors and Stores! @JohnBoozman                                       |
| 3    | Non-election placebo (all groups) | Extraordinary times require even closer cooperation between friends. Thank you India and the Indian people for the decision on HCQ. Will not be forgotten! Thank you Prime Minister @NarendraModi for your strong leadership in helping not just India, but humanity, in this fight!  |

Continued on next page

Table SI-1 – continued from previous page

| Wave | Group                             | Tweet text                                                                                                                                                                                                                                                                              |
|------|-----------------------------------|-----------------------------------------------------------------------------------------------------------------------------------------------------------------------------------------------------------------------------------------------------------------------------------------|
| 3    | Non-election placebo (all groups) | Just spoke to Prime Minister Abiy Ahmed Ali of Ethiopia. His Country needs Ventilators, and the U.S. is in good position to help him. We will!                                                                                                                                          |
| 3    | Non-election placebo (all groups) | I just got off the phone with former American hostage Michael White, who is now in Zurich after being released from Iran. He will be on a U.S. plane shortly, and is COMING HOME...                                                                                                     |
| 3    | Non-election placebo (all groups) | Congratulations to my friend President @Andrzej-Duda of Poland on his historic re-election! Looking forward to continuing our important work together across many issues, including defense, trade, energy, and telecommunications security!                                            |
| 3    | Non-election placebo (all groups) | I am proud to announce \$2 million for the @Sept11Memorial in NYC! This special site ensures that the memory of the nearly 3,000 people killed in the terror attacks of September 11, 2001, as well as those lost in the World Trade Center bombing in 1993, will never be forgotten!   |
| 3    | Non-election placebo (all groups) | My Administration is closely monitoring Hurricane Douglas off Hawaii & Hurricane Hanna, which has now made landfall in Texas. We continue to coordinate closely with both states – listen to your emergency management officials @Hawaii_EMA & @TDEM to protect your family & property! |
| 3    | Non-election placebo (all groups) | I am deeply saddened by the tragic loss of eight Marines and one Sailor during a training exercise off the coast of California. Our prayers are with their families. I thank them for the brave service their loved ones gave to our Nation. #SemperFidelis                             |
| 3    | Non-election placebo (all groups) | Just returned to Washington from Louisiana & Texas, after tours and discussions concerning Hurricane Laura. Thank you to @FEMA and ALL. God bless the families of those who perished!                                                                                                   |
| 3    | Non-election placebo              | Just had a nice conversation with Prime Minister @JustinTrudeau of Canada. Great to hear that his wonderful wife Sophie is doing very well. The United States and Canada will continue to coordinate closely together on COVID-19.                                                      |
| 3    | Non-election placebo              | My team is closely monitoring the flooding in Central Michigan – Stay SAFE and listen to local officials. Our brave First Responders are once again stepping up to serve their fellow citizens, THANK YOU!                                                                              |
| 3    | Non-election placebo              | Another \$298M heading to @MTA, adding up to over \$2B in federal funding from @USDOT so far, part of the \$3.9B total from the CARES Act. This is critical to keeping essential personnel moving and aiding metro NYC in recovery. We are here for the people of New York!             |
| 3    | Non-election placebo              | HAPPY MEMORIAL DAY!                                                                                                                                                                                                                                                                     |
| 3    | Non-election placebo              | In addition to nearly \$8 billion that Treasury provided tribal communities, @HUDgov is releasing an additional \$25 million in #CARESAct funding today to respond to the CoronaVirus with improved housing, indoor air quality, and food pantry support.                               |

Continued on next page



Table SI-1 – continued from previous page

| Wave | Group                | Tweet text                                                                                                                                                                                                                                                                          |
|------|----------------------|-------------------------------------------------------------------------------------------------------------------------------------------------------------------------------------------------------------------------------------------------------------------------------------|
| 3    | Non-election placebo | Today we celebrated the passage of landmark legislation that will preserve America’s majestic natural wonders, priceless historic treasures, grand national monuments, and glorious national parks. It was my great honor to sign the Great American Outdoors Act into law! #HR1957 |
| 3    | Non-election placebo | Had a lengthy discussion this morning with President Macron of France concerning numerous subjects, but in particular the catastrophic event which took place in Beirut, Lebanon...                                                                                                 |
| 3    | Non-election placebo | Sad to see the damage from the derecho in Midwest. 112 mile per hour winds in Midway, Iowa! The Federal government is in close coordination with State officials. We are with you all the way – Stay safe and strong!                                                               |
| 3    | Non-election placebo | Just approved (and fast) the FULL Emergency Declaration for the Great State of Iowa. They got hit hard by record setting winds. Thank you to @SenJoniErnst, @ChuckGrassley, and Governor Kim Reynolds.                                                                              |
| 3    | Non-election placebo | I am pleased to inform the American Public that Acting Secretary Chad Wolf will be nominated to be the Secretary of Homeland Security. Chad has done an outstanding job and we greatly appreciate his service!                                                                      |
| 3    | Election placebo     | I hope we can get Admiral @RonnyJackson4TX of Texas, who served our Country so well, into the runoff election in #TX13! Ronny is strong on Crime and Borders, GREAT for our Military and Vets, and will protect your #2A. Get out and vote for Ronny on Tuesday, March 3rd!         |
| 3    | Election placebo     | Mississippi, there is a VERY important election for Governor on November 5th. I need you to Get Out and Vote for our Great Republican nominee, @TateReeves. Tate is strong on Crime, tough on Illegal Immigration, and will protect your Second Amendment...                        |
| 3    | Election placebo     | The two big Congressional wins in North Carolina on Tuesday, Dan Bishop and Greg Murphy, have reverberated all over the World. They showed a lot of people how strong the Republican Party is, and how well it is doing. 2020 is a big, and very important, Election. We will WIN!  |
| 3    | Election placebo     | Megan King, who is running for Superior Court Judge in the Pennsylvania election, has my Full and Total Endorsement. She is tough on crime and fully understands all aspects of the law. Vote for Megan tomorrow (Tuesday).                                                         |
| 3    | Election placebo     | Thank you to the Republican National Committee, (the RNC), who voted UNANIMOUSLY yesterday to support me in the upcoming 2020 Election. Considering that we have done more than any Administration in the first two years, this should be easy. More great things now in the works! |
| 3    | Election placebo     | Vote for TRUMP on November 3rd. I am going to bring our beloved New York back!                                                                                                                                                                                                      |
| 3    | Election placebo     | VOTE TODAY! Go to <a href="http://vote.gop">http://vote.gop</a> to find your polling location. We are going to Make America Great Again! #VoteTrump #ElectionDay                                                                                                                    |
| 3    | Election placebo     | NOVEMBER 3RD.                                                                                                                                                                                                                                                                       |

Continued on next page



Table SI-1 – continued from previous page

| Wave | Group                    | Tweet text                                                                                                                                                                                                                                                                               |
|------|--------------------------|------------------------------------------------------------------------------------------------------------------------------------------------------------------------------------------------------------------------------------------------------------------------------------------|
| 3    | Election placebo         | Scott Walker is very special and will have another great win in November. He has done a fantastic job as Governor of Wisconsin and will always have my full support and Endorsement!                                                                                                     |
| 3    | Election placebo         | REGISTER TO <a href="http://Vote.GOP!">http://Vote.GOP!</a> #MAGA                                                                                                                                                                                                                        |
| 3    | General norm violations  | .@GoyaFoods is doing GREAT. The Radical Left smear machine backfired, people are buying like crazy!                                                                                                                                                                                      |
| 3    | General norm violations  | Mayor Wheeler just got harassed out of his own home in Portland by so-called “friendly protesters”. The Anarchists, Agitators and Looters treat him HORRIBLY, even though he is so nice and respectful to them. Criminals only understand strength!                                      |
| 3    | General norm violations  | Ted Wheeler, the wacky Radical Left Do Nothing Democrat Mayor of Portland, who has watched great death and destruction of his City during his tenure, thinks this lawless situation should go on forever. Wrong! Portland will never recover with a fool for a Mayor...                  |
| 3    | General norm violations  | “Regulate Twitter if they are going to start regulating free speech.” @JudgeJeanine @foxandfriends Well, as they have just proven conclusively, that’s what they are doing. Repeal Section 230!!!                                                                                        |
| 3    | General norm violations  | Two months in jail for a Swamp Creature, yet 9 years recommended for Roger Stone (who was not even working for the Trump Campaign). Gee, that sounds very fair! Rogue prosecutors maybe? The Swamp! @foxandfriends @TuckerCarlson                                                        |
| 3    | General norm violations  | “Sotomayor accuses GOP appointed Justices of being biased in favor of Trump.” @IngrahamAngle @FoxNews This is a terrible thing to say. Trying to “shame” some into voting her way? She never criticized Justice Ginsberg when she called me a “faker”. Both should recuse themselves..   |
| 3    | General norm violations  | “I agree with the President, the Supreme Court got it wrong. There should be a question about Citizenship on the Census. A.G. Barr sees a pathway to add the Citizenship Question.” Steve Doocy @foxandfriends Working hard on something that should be so easy. People are fed up!      |
| 3    | General norm violations  | THE ENEMY OF THE PEOPLE. Sadly, our Lamestream Media is TOTALLY CORRUPT!                                                                                                                                                                                                                 |
| 3    | General norm violations  | I just cannot state strongly enough how totally dishonest much of the Media is. Truth doesn’t matter to them, they only have their hatred & agenda. This includes fake books, which come out about me all the time, always anonymous sources, and are pure fiction. Enemy of the People! |
| 3    | General norm violations  | Has anyone looked at the mistakes that John Brennan made while serving as CIA Director? He will go down as easily the WORST in history & since getting out, he has become nothing less than a loudmouth, partisan, political hack who cannot be trusted with the secrets to our country! |
| 3    | Election norm violations | They are taking the nomination away from Bernie for a second time. Rigged!                                                                                                                                                                                                               |

Continued on next page

Table SI-1 – continued from previous page

| Wave | Group                                | Tweet text                                                                                                                                                                                                                                                                               |
|------|--------------------------------------|------------------------------------------------------------------------------------------------------------------------------------------------------------------------------------------------------------------------------------------------------------------------------------------|
| 3    | Election norm violations             | .@GOPLeader Kevin McCarthy informed me that I was 20 for 20 on Tuesday with respect to my Endorsement of candidates. Sadly, I didn't get that information from the Fake News Media. They don't report those things, or the far more than Dems cumulative votes, despite no opposition!   |
| 3    | Election norm violations             | We can't let the Fake News, and their partner, the Radical Left, Do Nothing Democrats, get away with stealing the Election. They tried that in 2016. How did that work out?                                                                                                              |
| 3    | Election norm violations             | Governor @GavinNewsom of California won't let restaurants, beaches and stores open, but he installs a voting booth system in a highly Democrat area (supposed to be mail in ballots only) because our great candidate, @MikeGarcia2020, is winning by a lot. CA25 Rigged Election!       |
| 3    | Election norm violations             | State of Nevada "thinks" that they can send out illegal vote by mail ballots, creating a great Voter Fraud scenario for the State and the U.S. They can't! If they do, "I think" I can hold up funds to the State. Sorry, but you must not cheat in elections. @RussVought45 @USTreasury |
| 3    | Election norm violations             | There is NO WAY (ZERO!) that Mail-In Ballots will be anything less than substantially fraudulent. Mail boxes will be robbed, ballots will be forged & even illegally printed out & fraudulently signed. The Governor of California is sending Ballots to millions of people, anyone...   |
| 3    | Election norm violations             | Rigged Election, and EVERYONE knows it!                                                                                                                                                                                                                                                  |
| 3    | Election norm violations             | With Universal Mail-In Voting (not Absentee Voting, which is good), 2020 will be the most INACCURATE & FRAUDULENT Election in history. It will be a great embarrassment to the USA. Delay the Election until people can properly, securely and safely vote???                            |
| 3    | Election norm violations             | In an illegal late night coup, Nevada's clubhouse Governor made it impossible for Republicans to win the state. Post Office could never handle the Traffic of Mail-In Votes without preparation. Using Covid to steal the state. See you in Court!                                       |
| 3    | Election norm violations             | The Democrats know the 2020 Election will be a fraudulent mess. Will maybe never know who won!                                                                                                                                                                                           |
| 4    | Election norm violations(all groups) | CA25 is a Rigged Election. Trying to steal it from @MikeGarcia2020. @GavinNewsom must act now!                                                                                                                                                                                           |
| 4    | Election norm violations(all groups) | RIGGED 2020 ELECTION: MILLIONS OF MAIL-IN BALLOTS WILL BE PRINTED BY FOREIGN COUNTRIES, AND OTHERS. IT WILL BE THE SCANDAL OF OUR TIMES!                                                                                                                                                 |
| 4    | Election norm violations(all groups) | New York Mail-In voting is in a disastrous state of condition. Votes from many weeks ago are missing - a total mess. They have no idea what is going on. Rigged Election. I told you so. Same thing would happen, but on massive scale, with USA. Fake News refuses to report!           |
| 4    | Election norm violations(all groups) | They are sending out 51,000,000 Ballots to people who haven't even requested a Ballot. Many of those people don't even exist. They are trying to STEAL this election. This should not be allowed!                                                                                        |

911 **Additional results**

912 **Attrition analysis.** Attrition was not random in our study. We tested the null hypothesis of no difference in observable  
913 characteristics between respondents who did not complete all waves of the survey and those who completed all four waves for a  
914 preregistered series of covariates: Republican identification/lean, nonwhite racial identification, age group, college graduate,  
915 male self-identification, the three measures of election norm respect in wave 1, trust in elections as measured in wave 1, support  
916 for political violence in wave 1, support for democracy in wave 1, and belief in voter fraud in wave 1. We used *t*-tests with  
917 unequal variances for the binary and continuous measures and chi-squared tests for factors and applied a procedure to control  
918 the false discovery rate (4) ( $\alpha = .05$ ). Across a total of 16 *t*-tests and eight  $\chi^2$  tests, we find that Republicans, nonwhite  
919 respondents in wave 3, and respondents with lower respect for election-related norms, lower trust and confidence in elections,  
920 higher support for political violence, lower support for democracy, and higher belief in voter fraud were more likely to attrit  
921 ( $p < .05$ ).

922 However, attrition does not threaten to bias our treatment effect estimates if it is uniform across conditions. We therefore  
923 conducted a series of preregistered tests for differential attrition across treatment groups in our sample. First, we tested the  
924 null hypothesis of no difference in attrition rate between conditions in wave 3 and wave 4 of our survey using a  $\chi^2$  test. We fail  
925 to reject the null in each case. Retention by condition from wave 2 (the first experimental wave) was 90.3% for the control  
926 group in wave 3 and 93.7% in wave 4; 91.5% for the General norm violations group in wave 3 and 93.2% in wave 4; and 91.5%  
927 for the Election norm violations group in wave 3 and 93.6% in wave 4. We also tested the null of no difference in observable  
928 characteristics between people who attrit by condition and wave. Across a total of 72 preregistered tests (48 *t*-tests and 24  $\chi^2$   
929 tests), we rejected the null just one time: respondents in the control group in wave 3 who did not complete the entire survey  
930 had, on average, lower respect for the norm of accepting elections peacefully in wave 1 than respondents in the Election norm  
931 violations condition.

932 We therefore conclude that there is little evidence of differential attrition by condition. Assignment to treatment does  
933 not measurably affect respondents' likelihood of completing the survey, nor do those who completed followup waves within  
934 condition differ measurably in almost any case on observables from those who did not.

**Table SI-2. Sample demographics and balance across treatment conditions**

|                            | Non-election placebo | Election placebo | Non-election norm violation | Election norm violation | Total |
|----------------------------|----------------------|------------------|-----------------------------|-------------------------|-------|
| <i>Age</i>                 |                      |                  |                             |                         |       |
| 18-34                      | 37.5%                | 32.7%            | 36.8%                       | 34.4%                   | 35.4% |
| 35-44                      | 28.1%                | 33.5%            | 29.5%                       | 30.7%                   | 30.3% |
| 45-54                      | 17.6%                | 16.3%            | 17.0%                       | 17.6%                   | 17.2% |
| 55-64                      | 9.4%                 | 9.7%             | 12.1%                       | 12.0%                   | 11.2% |
| 65+                        | 7.4%                 | 7.7%             | 4.6%                        | 5.3%                    | 5.8%  |
| <i>Sex</i>                 |                      |                  |                             |                         |       |
| Female                     | 48.1%                | 49.0%            | 52.3%                       | 53.5%                   | 51.5% |
| Male                       | 51.9%                | 51.0%            | 47.7%                       | 46.5%                   | 48.5% |
| <i>Education</i>           |                      |                  |                             |                         |       |
| High school or less        | 9.6%                 | 10.0%            | 7.9%                        | 9.2%                    | 9.0%  |
| Some college/associate     | 30.0%                | 27.8%            | 26.5%                       | 26.9%                   | 27.4% |
| Bachelor's degree          | 42.1%                | 42.1%            | 44.8%                       | 44.4%                   | 43.8% |
| Graduate degree            | 18.2%                | 20.1%            | 20.8%                       | 19.5%                   | 19.8% |
| <i>Race</i>                |                      |                  |                             |                         |       |
| White                      | 79.1%                | 82.5%            | 81.5%                       | 80.6%                   | 81.0% |
| Non-white                  | 20.9%                | 17.5%            | 18.5%                       | 19.4%                   | 19.0% |
| <i>Party</i>               |                      |                  |                             |                         |       |
| Democrat                   | 58.8%                | 61.1%            | 60.7%                       | 62.4%                   | 61.0% |
| Republican                 | 39.3%                | 37.1%            | 37.9%                       | 36.2%                   | 37.4% |
| Independent/something else | 1.9%                 | 1.7%             | 1.4%                        | 1.4%                    | 1.5%  |
| <i>Trump approval</i>      |                      |                  |                             |                         |       |
| Trump approver             | 31.6%                | 31.8%            | 30.7%                       | 29.8%                   | 30.7% |
| Trump disapprover          | 68.4%                | 68.2%            | 69.3%                       | 70.2%                   | 69.3% |

*N* = 2151. Respondents who chose "other" for gender (*N* = 5) and any respondents with missing data for demographic variables are excluded from the above percentages. Party identification includes partisan leaners.

**Table SI-3. Mean values for main outcomes in non-election/election placebo conditions**

|                                           | Non-election placebo | Election placebo | <i>p</i> -value |
|-------------------------------------------|----------------------|------------------|-----------------|
| <i>Trust and confidence in elections</i>  |                      |                  |                 |
| Wave 2                                    | -0.012               | -0.016           | 0.959           |
| Wave 3                                    | 0.019                | 0.030            | 0.880           |
| Wave 4                                    | 0.017                | 0.017            | 0.996           |
| Mean                                      | -0.001               | 0.008            | 0.888           |
| <i>Accept election results peacefully</i> |                      |                  |                 |
| Wave 2                                    | 5.407                | 5.477            | 0.294           |
| Wave 3                                    | 5.413                | 5.399            | 0.852           |
| Wave 4                                    | 5.410                | 5.403            | 0.922           |
| Mean                                      | 5.388                | 5.410            | 0.726           |
| <i>Elections rigged for other party</i>   |                      |                  |                 |
| Wave 2                                    | 3.313                | 3.360            | 0.688           |
| Wave 3                                    | 3.307                | 3.334            | 0.827           |
| Wave 4                                    | 3.419                | 3.421            | 0.984           |
| Mean                                      | 3.359                | 3.397            | 0.734           |
| <i>Violence needed during vote count</i>  |                      |                  |                 |
| Wave 2                                    | 1.695                | 1.729            | 0.702           |
| Wave 3                                    | 1.708                | 1.808            | 0.286           |
| Wave 4                                    | 1.764                | 1.785            | 0.827           |
| Mean                                      | 1.745                | 1.796            | 0.534           |

$N = 2151$ . Cell entries in the middle two columns are means by condition for outcomes in left column; *p*-values from two-sample *t*-tests with unequal variances in right column.

**Table SI-4. Treatment effects on trust and confidence in elections**

|                                    | Wave 2           | Wave 3            | Wave 4            | Mean              |
|------------------------------------|------------------|-------------------|-------------------|-------------------|
| Election norm violations           | 0.025<br>(0.029) | -0.006<br>(0.032) | 0.003<br>(0.031)  | 0.001<br>(0.026)  |
| General norm violations            | 0.013<br>(0.028) | -0.035<br>(0.031) | -0.019<br>(0.030) | -0.017<br>(0.025) |
| Election – General norm violations | 0.012<br>(0.029) | 0.029<br>(0.031)  | 0.023<br>(0.030)  | 0.016<br>(0.026)  |
| Control variables                  | ✓                | ✓                 | ✓                 | ✓                 |
| N                                  | 2137             | 1950              | 2001              | 2137              |

\*  $p < .05$ , \*\*  $p < .01$ , \*\*\*  $p < .005$  (two-sided; adjusted to control the false discovery rate (4) with  $\alpha = .05$ ). Cell entries are OLS coefficients with robust standard errors in parentheses. All models control for pre-treatment variables selected as most prognostic via lasso regression (see preregistration for details and list of candidate variables). Dependent variables are standardized factor scores. Mean outcome calculated among non-missing values for each respondent.

**Table SI-5. Treatment effects on support for democratic norms**

|                                    | Accept election results peacefully |                   |                   |                   | Elections rigged for other party |                  |                   |                   | Violence needed during vote count |                   |                   |                   |
|------------------------------------|------------------------------------|-------------------|-------------------|-------------------|----------------------------------|------------------|-------------------|-------------------|-----------------------------------|-------------------|-------------------|-------------------|
|                                    | Wave 2                             | Wave 3            | Wave 4            | Mean              | Wave 2                           | Wave 3           | Wave 4            | Mean              | Wave 2                            | Wave 3            | Wave 4            | Mean              |
| Election norm violations           | -0.077<br>(0.040)                  | 0.001<br>(0.043)  | 0.002<br>(0.042)  | -0.030<br>(0.032) | 0.140<br>(0.058)                 | 0.125<br>(0.058) | -0.061<br>(0.056) | 0.059<br>(0.048)  | 0.084<br>(0.050)                  | 0.031<br>(0.053)  | 0.002<br>(0.053)  | 0.030<br>(0.043)  |
| General norm violations            | -0.058<br>(0.039)                  | -0.015<br>(0.043) | 0.003<br>(0.043)  | -0.024<br>(0.032) | 0.103<br>(0.056)                 | 0.112<br>(0.058) | -0.004<br>(0.058) | 0.067<br>(0.048)  | 0.186*<br>(0.050)                 | 0.105<br>(0.053)  | 0.117<br>(0.055)  | 0.134<br>(0.043)  |
| Election – General norm violations | -0.018<br>(0.041)                  | 0.016<br>(0.041)  | -0.001<br>(0.042) | -0.006<br>(0.032) | 0.037<br>(0.058)                 | 0.012<br>(0.058) | -0.056<br>(0.055) | -0.008<br>(0.048) | -0.102<br>(0.052)                 | -0.073<br>(0.053) | -0.115<br>(0.055) | -0.105<br>(0.044) |
| Control variables                  | ✓                                  | ✓                 | ✓                 | ✓                 | ✓                                | ✓                | ✓                 | ✓                 | ✓                                 | ✓                 | ✓                 | ✓                 |
| N                                  | 2137                               | 1950              | 2001              | 2137              | 2137                             | 1949             | 2001              | 2137              | 2137                              | 1950              | 2001              | 2137              |

\*  $p < .05$ , \*\*  $p < .01$ , \*\*\*  $p < .005$  (two-sided); adjusted to control the false discovery rate (4) with  $\alpha = .05$ . Cell entries are OLS coefficients with robust standard errors in parentheses. All models control for pre-treatment variables selected as most prognostic via lasso regression (see preregistration for details and list of candidate variables). Mean outcome calculated among non-missing values for each respondent.

**Table SI-6. Treatment effects on support for political violence and democracy**

|                                    | Political violence | Support for democracy |
|------------------------------------|--------------------|-----------------------|
| Election norm violations           | −0.040<br>(0.034)  | −0.025<br>(0.031)     |
| General norm violations            | 0.021<br>(0.036)   | 0.036<br>(0.033)      |
| Election – General norm violations | −0.061<br>(0.034)  | −0.061<br>(0.032)     |
| Control variables                  | ✓                  | ✓                     |
| N                                  | 2001               | 2001                  |

\*  $p < .05$ , \*\*  $p < .01$ , \*\*\*  $p < .005$  (two-sided; adjusted to control the false discovery rate (4) with  $\alpha = .05$ ). Cell entries are OLS coefficients with robust standard errors in parentheses. All models control for pre-treatment variables selected as most prognostic via lasso regression (see preregistration for details and list of candidate variables). Dependent variables are factor scores combining responses to questions on political violence and support for democracy. Marginal effects of the treatments on these outcomes (“Election – General norm violations” row) were not preregistered and are thus exploratory; we include these estimates for presentational consistency.



**Table SI-7. Treatment effects on trust and confidence in elections (by Trump approval)**

**(a) Statistical model results**

|                                | Wave 2               | Wave 3               | Wave 4               | Mean                 |
|--------------------------------|----------------------|----------------------|----------------------|----------------------|
| Election norm violations       | 0.137***<br>(0.034)  | 0.114*<br>(0.036)    | 0.085<br>(0.035)     | 0.106**<br>(0.030)   |
| Election norm × Trump approver | -0.364***<br>(0.065) | -0.405***<br>(0.073) | -0.274***<br>(0.069) | -0.348***<br>(0.058) |
| General norm violations        | 0.083<br>(0.032)     | 0.006<br>(0.035)     | 0.006<br>(0.035)     | 0.033<br>(0.029)     |
| General norm × Trump approver  | -0.220**<br>(0.064)  | -0.133<br>(0.071)    | -0.080<br>(0.067)    | -0.158*<br>(0.057)   |
| Control variables              | ✓                    | ✓                    | ✓                    | ✓                    |
| N                              | 2137                 | 1950                 | 2001                 | 2137                 |

\*  $p < .05$ , \*\*  $p < .01$ , \*\*\*  $p < .005$  (two-sided; adjusted to control the false discovery rate (4) with  $\alpha = .05$ ). Cell entries are OLS coefficients with robust standard errors in parentheses. All models control for pre-treatment variables selected as most prognostic via lasso regression (see preregistration for details and list of candidate variables). Dependent variables are standardized factor scores. Mean outcome calculated among non-missing values for each respondent.

**(b) Subgroup marginal effects**

|                                | Wave 2               | Wave 3               | Wave 4             | Mean                 |
|--------------------------------|----------------------|----------------------|--------------------|----------------------|
| <i>Election norm violation</i> |                      |                      |                    |                      |
| Trump approver                 | -0.227***<br>(0.055) | -0.291***<br>(0.064) | -0.189*<br>(0.060) | -0.242***<br>(0.049) |
| Trump disapprover              | 0.137***<br>(0.034)  | 0.114*<br>(0.036)    | 0.085<br>(0.035)   | 0.106**<br>(0.030)   |
| <i>General norm violation</i>  |                      |                      |                    |                      |
| Trump approver                 | -0.137<br>(0.055)    | -0.127<br>(0.062)    | -0.075<br>(0.057)  | -0.125<br>(0.049)    |
| Trump disapprover              | 0.083<br>(0.032)     | 0.006<br>(0.035)     | 0.006<br>(0.035)   | 0.033<br>(0.029)     |

\*  $p < .05$ , \*\*  $p < .01$ , \*\*\*  $p < .005$  (two-sided; adjusted to control the false discovery rate (4) with  $\alpha = .05$ ). Marginal effect estimates calculated from Table SI-7a.

**Table SI-8. Treatment effects on trust and confidence in elections (by party)**

**(a) Statistical model results**

|                          | Wave 2               | Wave 3               | Wave 4             | Mean                 |
|--------------------------|----------------------|----------------------|--------------------|----------------------|
| Election norm violations | 0.132**<br>(0.037)   | 0.097<br>(0.039)     | 0.068<br>(0.038)   | 0.090*<br>(0.032)    |
| Election norm × Repub.   | -0.293***<br>(0.061) | -0.287***<br>(0.068) | -0.181*<br>(0.064) | -0.250***<br>(0.054) |
| General norm violations  | 0.078<br>(0.036)     | -0.014<br>(0.038)    | 0.003<br>(0.037)   | 0.023<br>(0.032)     |
| General norm × Repub.    | -0.180*<br>(0.058)   | -0.070<br>(0.065)    | -0.080<br>(0.063)  | -0.118<br>(0.053)    |
| Control variables        | ✓                    | ✓                    | ✓                  | ✓                    |
| N                        | 2104                 | 1921                 | 1970               | 2104                 |

\*  $p < .05$ , \*\*  $p < .01$ , \*\*\*  $p < .005$  (two-sided; adjusted to control the false discovery rate (4) with  $\alpha = .05$ ). Cell entries are OLS coefficients with robust standard errors in parentheses. Reference category for Republican indicator is Democrats (party variables include leaners; true independents excluded). All models control for pre-treatment variables selected as most prognostic via lasso regression (see preregistration for details and list of candidate variables). Dependent variables are standardized factor scores. Mean outcome calculated among non-missing values for each respondent.

**(b) Subgroup marginal effects**

|                                | Wave 2             | Wave 3             | Wave 4            | Mean                 |
|--------------------------------|--------------------|--------------------|-------------------|----------------------|
| <i>Election norm violation</i> |                    |                    |                   |                      |
| Republican                     | -0.162*<br>(0.049) | -0.190*<br>(0.056) | -0.113<br>(0.052) | -0.160***<br>(0.043) |
| Democrat                       | 0.132**<br>(0.037) | 0.097<br>(0.039)   | 0.068<br>(0.038)  | 0.090*<br>(0.032)    |
| <i>General norm violation</i>  |                    |                    |                   |                      |
| Republican                     | -0.102<br>(0.046)  | -0.084<br>(0.052)  | -0.077<br>(0.051) | -0.096<br>(0.042)    |
| Democrat                       | 0.078<br>(0.036)   | -0.014<br>(0.038)  | 0.003<br>(0.037)  | 0.023<br>(0.032)     |

\*  $p < .05$ , \*\*  $p < .01$ , \*\*\*  $p < .005$  (two-sided; adjusted to control the false discovery rate (4) with  $\alpha = .05$ ). Marginal effect estimates calculated from Table SI-8a.

**Table SI-9. Statistical models of support for democratic norms by Trump approval**

|                                | Accept election results peacefully |                   |                   |                   | Elections rigged for other party |                  |                   |                   | Violence needed during vote count |                   |                   |                   |
|--------------------------------|------------------------------------|-------------------|-------------------|-------------------|----------------------------------|------------------|-------------------|-------------------|-----------------------------------|-------------------|-------------------|-------------------|
|                                | Wave 2                             | Wave 3            | Wave 4            | Mean              | Wave 2                           | Wave 3           | Wave 4            | Mean              | Wave 2                            | Wave 3            | Wave 4            | Mean              |
| Election norm violations       | -0.001<br>(0.045)                  | 0.043<br>(0.049)  | 0.023<br>(0.047)  | 0.014<br>(0.036)  | 0.012<br>(0.070)                 | 0.030<br>(0.070) | -0.094<br>(0.066) | -0.020<br>(0.059) | 0.025<br>(0.058)                  | -0.014<br>(0.064) | -0.045<br>(0.061) | -0.024<br>(0.051) |
| Election norm × Trump approver | -0.252<br>(0.094)                  | -0.141<br>(0.099) | -0.072<br>(0.101) | -0.148<br>(0.076) | 0.423**<br>(0.122)               | 0.318<br>(0.125) | 0.114<br>(0.125)  | 0.260<br>(0.102)  | 0.195<br>(0.116)                  | 0.152<br>(0.113)  | 0.155<br>(0.119)  | 0.175<br>(0.092)  |
| General norm violations        | -0.082<br>(0.046)                  | -0.017<br>(0.048) | -0.028<br>(0.047) | -0.048<br>(0.036) | 0.118<br>(0.068)                 | 0.100<br>(0.070) | -0.002<br>(0.067) | 0.074<br>(0.059)  | 0.187*<br>(0.060)                 | 0.065<br>(0.063)  | 0.066<br>(0.062)  | 0.108<br>(0.051)  |
| General norm × Trump approver  | 0.077<br>(0.087)                   | 0.009<br>(0.099)  | 0.106<br>(0.103)  | 0.077<br>(0.074)  | -0.050<br>(0.118)                | 0.039<br>(0.123) | -0.010<br>(0.131) | -0.025<br>(0.100) | -0.007<br>(0.110)                 | 0.132<br>(0.117)  | 0.168<br>(0.130)  | 0.085<br>(0.094)  |
| Control variables              | ✓                                  | ✓                 | ✓                 | ✓                 | ✓                                | ✓                | ✓                 | ✓                 | ✓                                 | ✓                 | ✓                 | ✓                 |
| N                              | 2137                               | 1950              | 2001              | 2137              | 2137                             | 1949             | 2001              | 2137              | 2137                              | 1950              | 2001              | 2137              |

\*  $p < .05$ , \*\*  $p < .01$ , \*\*\*  $p < .005$  (two-sided; adjusted to control the false discovery rate (4) with  $\alpha = .05$ ). Cell entries are OLS coefficients with robust standard errors in parentheses. All models control for pre-treatment variables selected as most prognostic via lasso regression (see preregistration for details and list of candidate variables). Mean outcome calculated among non-missing values for each respondent.

**Table SI-10. Subgroup marginal effects for support for democratic norms by Trump approval**

|                                | Accept election results peacefully |                   |                   |                   | Elections rigged for other party |                   |                   |                   | Violence needed during vote count |                   |                   |                   |
|--------------------------------|------------------------------------|-------------------|-------------------|-------------------|----------------------------------|-------------------|-------------------|-------------------|-----------------------------------|-------------------|-------------------|-------------------|
|                                | Wave 2                             | Wave 3            | Wave 4            | Mean              | Wave 2                           | Wave 3            | Wave 4            | Mean              | Wave 2                            | Wave 3            | Wave 4            | Mean              |
| <i>Election norm violation</i> |                                    |                   |                   |                   |                                  |                   |                   |                   |                                   |                   |                   |                   |
| Trump approver                 | -0.252*<br>(0.082)                 | -0.098<br>(0.086) | -0.049<br>(0.089) | -0.134<br>(0.066) | 0.435***<br>(0.100)              | 0.348*<br>(0.104) | 0.020<br>(0.107)  | 0.240*<br>(0.083) | 0.220<br>(0.100)                  | 0.138<br>(0.093)  | 0.110<br>(0.103)  | 0.147<br>(0.078)  |
| Trump disapprover              | -0.001<br>(0.045)                  | 0.043<br>(0.049)  | 0.023<br>(0.047)  | 0.014<br>(0.036)  | 0.012<br>(0.070)                 | 0.030<br>(0.070)  | -0.094<br>(0.066) | -0.020<br>(0.059) | 0.025<br>(0.058)                  | -0.014<br>(0.064) | -0.045<br>(0.061) | -0.024<br>(0.051) |
| <i>General norm violation</i>  |                                    |                   |                   |                   |                                  |                   |                   |                   |                                   |                   |                   |                   |
| Trump approver                 | -0.005<br>(0.073)                  | -0.008<br>(0.087) | 0.077<br>(0.092)  | 0.029<br>(0.064)  | 0.068<br>(0.097)                 | 0.139<br>(0.101)  | -0.012<br>(0.113) | 0.049<br>(0.082)  | 0.180<br>(0.092)                  | 0.197<br>(0.099)  | 0.234<br>(0.114)  | 0.192<br>(0.079)  |
| Trump disapprover              | -0.082<br>(0.046)                  | -0.017<br>(0.048) | -0.028<br>(0.047) | -0.048<br>(0.036) | 0.118<br>(0.068)                 | 0.100<br>(0.070)  | -0.002<br>(0.067) | 0.074<br>(0.059)  | 0.187*<br>(0.060)                 | 0.065<br>(0.063)  | 0.066<br>(0.062)  | 0.108<br>(0.051)  |

\*  $p < .05$ , \*\*  $p < .01$ , \*\*\*  $p < .005$  (two-sided; adjusted to control the false discovery rate (4) with  $\alpha = .05$ ). Marginal effect estimates calculated from Table SI-9.

**Table SI-11. Statistical models of support for democratic norms (by party)**

|                          | Accept election results peacefully |                   |                   |                   | Elections rigged for other party |                   |                   |                   | Violence needed during vote count |                   |                   |                   |
|--------------------------|------------------------------------|-------------------|-------------------|-------------------|----------------------------------|-------------------|-------------------|-------------------|-----------------------------------|-------------------|-------------------|-------------------|
|                          | Wave 2                             | Wave 3            | Wave 4            | Mean              | Wave 2                           | Wave 3            | Wave 4            | Mean              | Wave 2                            | Wave 3            | Wave 4            | Mean              |
| Election norm violations | -0.017<br>(0.048)                  | 0.038<br>(0.052)  | -0.032<br>(0.051) | -0.008<br>(0.039) | 0.030<br>(0.074)                 | 0.065<br>(0.074)  | -0.051<br>(0.069) | 0.004<br>(0.062)  | 0.005<br>(0.063)                  | -0.031<br>(0.071) | -0.053<br>(0.068) | -0.038<br>(0.056) |
| Election norm × Repub.   | -0.160<br>(0.088)                  | -0.084<br>(0.091) | 0.101<br>(0.091)  | -0.051<br>(0.069) | 0.317<br>(0.117)                 | 0.199<br>(0.119)  | 0.023<br>(0.117)  | 0.171<br>(0.098)  | 0.231<br>(0.108)                  | 0.190<br>(0.107)  | 0.167<br>(0.109)  | 0.201<br>(0.087)  |
| General norm violations  | -0.117<br>(0.052)                  | -0.038<br>(0.052) | -0.050<br>(0.050) | -0.073<br>(0.040) | 0.160<br>(0.073)                 | 0.135<br>(0.076)  | 0.014<br>(0.070)  | 0.099<br>(0.062)  | 0.189*<br>(0.067)                 | 0.079<br>(0.069)  | 0.059<br>(0.068)  | 0.117<br>(0.057)  |
| General norm × Repub.    | 0.153<br>(0.080)                   | 0.063<br>(0.092)  | 0.139<br>(0.094)  | 0.127<br>(0.067)  | -0.135<br>(0.111)                | -0.050<br>(0.116) | -0.017<br>(0.121) | -0.076<br>(0.096) | 0.009<br>(0.103)                  | 0.088<br>(0.109)  | 0.173<br>(0.118)  | 0.066<br>(0.088)  |
| Control variables        | ✓                                  | ✓                 | ✓                 | ✓                 | ✓                                | ✓                 | ✓                 | ✓                 | ✓                                 | ✓                 | ✓                 | ✓                 |
| N                        | 2104                               | 1921              | 1970              | 2104              | 2104                             | 1920              | 1970              | 2104              | 2104                              | 1921              | 1970              | 2104              |

\*  $p < .05$ , \*\*  $p < .01$ , \*\*\*  $p < .005$  (two-sided; adjusted to control the false discovery rate (4) with  $\alpha = .05$ ). Cell entries are OLS coefficients with robust standard errors in parentheses. Reference category for Republican indicator is Democrats (party variables include leaners; true independents excluded). All models control for pre-treatment variables selected as most prognostic via lasso regression (see preregistration for details and list of candidate variables). Mean outcome calculated among non-missing values for each respondent.

**Table SI-12. Subgroup marginal effects on support for democratic norms (by party)**

|                                | Accept election results peacefully |                   |                   |                   | Elections rigged for other party |                   |                   |                  | Violence needed during vote count |                   |                   |                   |
|--------------------------------|------------------------------------|-------------------|-------------------|-------------------|----------------------------------|-------------------|-------------------|------------------|-----------------------------------|-------------------|-------------------|-------------------|
|                                | Wave 2                             | Wave 3            | Wave 4            | Mean              | Wave 2                           | Wave 3            | Wave 4            | Mean             | Wave 2                            | Wave 3            | Wave 4            | Mean              |
| <i>Election norm violation</i> |                                    |                   |                   |                   |                                  |                   |                   |                  |                                   |                   |                   |                   |
| Republican                     | -0.177<br>(0.073)                  | -0.046<br>(0.076) | 0.069<br>(0.075)  | -0.059<br>(0.054) | 0.347***<br>(0.091)              | 0.264*<br>(0.093) | -0.027<br>(0.095) | 0.175<br>(0.077) | 0.235<br>(0.087)                  | 0.159<br>(0.080)  | 0.114<br>(0.085)  | 0.159<br>(0.067)  |
| Democrat                       | -0.017<br>(0.048)                  | 0.038<br>(0.052)  | -0.032<br>(0.051) | -0.008<br>(0.039) | 0.030<br>(0.074)                 | 0.065<br>(0.074)  | -0.051<br>(0.069) | 0.004<br>(0.062) | 0.005<br>(0.063)                  | -0.031<br>(0.071) | -0.053<br>(0.068) | -0.038<br>(0.056) |
| <i>General norm violation</i>  |                                    |                   |                   |                   |                                  |                   |                   |                  |                                   |                   |                   |                   |
| Republican                     | 0.036<br>(0.061)                   | 0.026<br>(0.075)  | 0.090<br>(0.080)  | 0.054<br>(0.054)  | 0.025<br>(0.084)                 | 0.085<br>(0.089)  | -0.003<br>(0.100) | 0.024<br>(0.074) | 0.198<br>(0.078)                  | 0.167<br>(0.084)  | 0.233<br>(0.096)  | 0.182<br>(0.068)  |
| Democrat                       | -0.117<br>(0.052)                  | -0.038<br>(0.052) | -0.050<br>(0.050) | -0.073<br>(0.040) | 0.160<br>(0.073)                 | 0.135<br>(0.076)  | 0.014<br>(0.070)  | 0.099<br>(0.062) | 0.189*<br>(0.067)                 | 0.079<br>(0.069)  | 0.059<br>(0.068)  | 0.117<br>(0.057)  |

\*  $p < .05$ , \*\*  $p < .01$ , \*\*\*  $p < .005$  (two-sided; adjusted to control the false discovery rate (4) with  $\alpha = .05$ ). Marginal effect estimates calculated from Table SI-11.

**Table SI-13. Treatment effects on support for political violence and democracy (by Trump approval)**

**(a) Statistical model results**

|                                | Political violence | Support for democracy |
|--------------------------------|--------------------|-----------------------|
| Election norm violations       | -0.016<br>(0.036)  | -0.041<br>(0.033)     |
| Election norm × Trump approver | -0.087<br>(0.084)  | 0.053<br>(0.076)      |
| General norm violations        | -0.027<br>(0.039)  | 0.002<br>(0.035)      |
| General norm × Trump approver  | 0.162<br>(0.087)   | 0.115<br>(0.079)      |
| Control variables              | ✓                  | ✓                     |
|                                | 2001               | 2001                  |

\*  $p < .05$ , \*\*  $p < .01$ , \*\*\*  $p < .005$  (two-sided; adjusted to control the false discovery rate (4) with  $\alpha = .05$ ). Cell entries are OLS coefficients with robust standard errors in parentheses. All models control for pre-treatment variables selected as most prognostic via lasso regression (see preregistration for details and list of candidate variables). Dependent variables are factor scores combining responses to questions on political violence and support for democracy.

**(b) Subgroup marginal effects**

|                                | Political violence | Support for democracy |
|--------------------------------|--------------------|-----------------------|
| <i>Election norm violation</i> |                    |                       |
| Trump approver                 | -0.103<br>(0.076)  | 0.012<br>(0.069)      |
| Trump disapprover              | -0.016<br>(0.036)  | -0.041<br>(0.033)     |
| <i>General norm violation</i>  |                    |                       |
| Trump approver                 | 0.135<br>(0.078)   | 0.117<br>(0.070)      |
| Trump disapprover              | -0.027<br>(0.039)  | 0.002<br>(0.035)      |

\*  $p < .05$ , \*\*  $p < .01$ , \*\*\*  $p < .005$  (two-sided; adjusted to control the false discovery rate (4) with  $\alpha = .05$ ). Marginal effect estimates calculated from Table SI-13a.

**Table SI-14. Treatment effects on support for political violence and democracy (by party)**

**(a) Statistical model results**

|                            | Political violence | Support for democracy |
|----------------------------|--------------------|-----------------------|
| Election norm violations   | -0.021<br>(0.042)  | -0.027<br>(0.034)     |
| Election norm × Republican | -0.047<br>(0.074)  | 0.005<br>(0.069)      |
| General norm violations    | -0.025<br>(0.045)  | 0.021<br>(0.037)      |
| General norm × Republican  | 0.122<br>(0.076)   | 0.027<br>(0.071)      |
| Control variables          | ✓                  | ✓                     |
|                            | 1970               | 1970                  |

\*  $p < .05$ , \*\*  $p < .01$ , \*\*\*  $p < .005$  (two-sided; adjusted to control the false discovery rate (4) with  $\alpha = .05$ ). Cell entries are OLS coefficients with robust standard errors in parentheses. Reference category for Republican indicator is Democrats (party variables include leaners; true independents excluded). All models control for pre-treatment variables selected as most prognostic via lasso regression (see preregistration for details and list of candidate variables). Dependent variables are factor scores combining responses to questions on political violence and support for democracy.

**(b) Subgroup marginal effects**

|                                | Political violence | Support for democracy |
|--------------------------------|--------------------|-----------------------|
| <i>Election norm violation</i> |                    |                       |
| Republican                     | -0.069<br>(0.061)  | -0.021<br>(0.060)     |
| Democrat                       | -0.021<br>(0.042)  | -0.027<br>(0.034)     |
| <i>General norm violation</i>  |                    |                       |
| Republican                     | 0.097<br>(0.062)   | 0.047<br>(0.061)      |
| Democrat                       | -0.025<br>(0.045)  | 0.021<br>(0.037)      |

\*  $p < .05$ , \*\*  $p < .01$ , \*\*\*  $p < .005$  (two-sided; adjusted to control the false discovery rate (4) with  $\alpha = .05$ ). Marginal effect estimates calculated from Table SI-14a.



**Table SI-15. Treatment effects on perceptions of past respect for democratic norms**

|                                    | Wave 2            | Wave 3            | Wave 4            | Mean              |
|------------------------------------|-------------------|-------------------|-------------------|-------------------|
| Election norm violations           | -0.016<br>(0.036) | 0.025<br>(0.036)  | 0.057<br>(0.033)  | 0.016<br>(0.029)  |
| General norm violations            | -0.006<br>(0.035) | -0.003<br>(0.035) | 0.071<br>(0.033)  | 0.018<br>(0.029)  |
| Election – General norm violations | -0.010<br>(0.036) | 0.029<br>(0.037)  | -0.013<br>(0.033) | -0.002<br>(0.030) |
| Control variables                  | ✓                 | ✓                 | ✓                 | ✓                 |
| N                                  | 2137              | 1950              | 2001              | 2137              |

\*  $p < .05$ , \*\*  $p < .01$ , \*\*\*  $p < .005$  (two-sided; adjusted to control the false discovery rate (4) with  $\alpha = .05$ ). Cell entries are OLS coefficients with robust standard errors in parentheses. All models control for pre-treatment variables selected as most prognostic via lasso regression (see preregistration for details and list of candidate variables). Dependent variables are respondent belief that presidential candidates in the past fifty years have accepted the outcome of elections even if they narrowly lose. Mean outcome calculated among non-missing values for each respondent. Marginal effects of the treatments on these outcomes (“Election – General norm violations” row) were not preregistered and are thus exploratory; we include these estimates for presentational consistency.

**Table SI-16. Treatment effects on perceptions of past respect for democratic norms (by Trump approval)**

**(a) Statistical model results**

|                                | Wave 2            | Wave 3            | Wave 4            | Mean              |
|--------------------------------|-------------------|-------------------|-------------------|-------------------|
| Election norm violations       | -0.009<br>(0.041) | 0.063<br>(0.041)  | 0.079<br>(0.039)  | 0.036<br>(0.034)  |
| Election norm × Trump approver | -0.023<br>(0.082) | -0.127<br>(0.083) | -0.073<br>(0.076) | -0.066<br>(0.068) |
| General norm violations        | -0.010<br>(0.041) | 0.015<br>(0.040)  | 0.080<br>(0.038)  | 0.020<br>(0.034)  |
| General norm × Trump approver  | 0.014<br>(0.078)  | -0.061<br>(0.083) | -0.030<br>(0.076) | -0.004<br>(0.066) |
| Control variables              | ✓                 | ✓                 | ✓                 | ✓                 |
| N                              | 2137              | 1950              | 2001              | 2137              |

\*  $p < .05$ , \*\*  $p < .01$ , \*\*\*  $p < .005$  (two-sided; adjusted to control the false discovery rate (4) with  $\alpha = .05$ ). Cell entries are OLS coefficients with robust standard errors in parentheses. All models control for pre-treatment variables selected as most prognostic via lasso regression (see preregistration for details and list of candidate variables). Dependent variables are factor scores combining responses to questions on political violence and support for democracy.

**(b) Subgroup marginal effects**

|                                | Wave 2            | Wave 3            | Wave 4           | Mean              |
|--------------------------------|-------------------|-------------------|------------------|-------------------|
| <i>Election norm violation</i> |                   |                   |                  |                   |
| Trump approver                 | -0.033<br>(0.071) | -0.064<br>(0.072) | 0.006<br>(0.066) | -0.030<br>(0.058) |
| Trump disapprover              | -0.009<br>(0.041) | 0.063<br>(0.041)  | 0.079<br>(0.039) | 0.036<br>(0.034)  |
| <i>General norm violation</i>  |                   |                   |                  |                   |
| Trump approver                 | 0.004<br>(0.067)  | -0.046<br>(0.073) | 0.050<br>(0.066) | 0.016<br>(0.056)  |
| Trump disapprover              | -0.010<br>(0.041) | 0.015<br>(0.040)  | 0.080<br>(0.038) | 0.020<br>(0.034)  |

\*  $p < .05$ , \*\*  $p < .01$ , \*\*\*  $p < .005$  (two-sided; adjusted to control the false discovery rate (4) with  $\alpha = .05$ ). Marginal effect estimates calculated from Table SI-16a.

**Table SI-17. Treatment effects on perceptions of past respect for democratic norms (by party)**

**(a) Statistical model results**

|                            | Wave 2            | Wave 3            | Wave 4           | Mean              |
|----------------------------|-------------------|-------------------|------------------|-------------------|
| Election norm violations   | 0.002<br>(0.043)  | 0.085<br>(0.043)  | 0.054<br>(0.041) | 0.041<br>(0.035)  |
| Election norm × Republican | -0.041<br>(0.077) | -0.141<br>(0.077) | 0.022<br>(0.071) | -0.051<br>(0.064) |
| General norm violations    | -0.032<br>(0.044) | 0.027<br>(0.043)  | 0.054<br>(0.040) | 0.007<br>(0.036)  |
| General norm × Republican  | 0.064<br>(0.073)  | -0.062<br>(0.076) | 0.045<br>(0.072) | 0.034<br>(0.062)  |
| Control variables          | ✓                 | ✓                 | ✓                | ✓                 |
| N                          | 2104              | 1921              | 1970             | 2104              |

\*  $p < .05$ , \*\*  $p < .01$ , \*\*\*  $p < .005$  (two-sided; adjusted to control the false discovery rate (4) with  $\alpha = .05$ ). Cell entries are OLS coefficients with robust standard errors in parentheses. All models control for pre-treatment variables selected as most prognostic via lasso regression (see preregistration for details and list of candidate variables). Dependent variables are factor scores combining responses to questions on political violence and support for democracy.

**(b) Subgroup marginal effects**

|                                | Wave 2            | Wave 3            | Wave 4           | Mean              |
|--------------------------------|-------------------|-------------------|------------------|-------------------|
| <i>Election norm violation</i> |                   |                   |                  |                   |
| Republican                     | -0.039<br>(0.064) | -0.056<br>(0.064) | 0.076<br>(0.058) | -0.010<br>(0.054) |
| Democrat                       | 0.002<br>(0.043)  | 0.085<br>(0.043)  | 0.054<br>(0.041) | 0.041<br>(0.035)  |
| <i>General norm violation</i>  |                   |                   |                  |                   |
| Republican                     | 0.032<br>(0.059)  | -0.035<br>(0.062) | 0.099<br>(0.059) | 0.041<br>(0.050)  |
| Democrat                       | -0.032<br>(0.044) | 0.027<br>(0.043)  | 0.054<br>(0.040) | 0.007<br>(0.036)  |

\*  $p < .05$ , \*\*  $p < .01$ , \*\*\*  $p < .005$  (two-sided; adjusted to control the false discovery rate (4) with  $\alpha = .05$ ). Marginal effect estimates calculated from Table SI-17a.

**Table SI-18. Wave 2→3 change within condition in reactions to norm violations**

|        | <u>Anger</u>      |                   | <u>Anxiety</u>    |                   | <u>Enthusiasm</u> |                  |
|--------|-------------------|-------------------|-------------------|-------------------|-------------------|------------------|
|        | Election          | General           | Election          | General           | Election          | General          |
| Wave 3 | -0.065<br>(0.026) | -0.081<br>(0.026) | -0.084<br>(0.026) | -0.055<br>(0.028) | 0.031<br>(0.025)  | 0.005<br>(0.027) |
| N      | 1316              | 1314              | 1316              | 1314              | 1316              | 1314             |

\*  $p < .05$ , \*\*  $p < .01$ , \*\*\*  $p < .005$  (two-sided; adjusted to control the false discovery rate (4) with  $\alpha = .05$ ). Cell entries are OLS coefficients with robust standard errors clustered by respondent in parentheses. All models control for pre-treatment variables selected as most prognostic via lasso regression (see preregistration for details and list of candidate variables). Dependent variable is mean value of how much people reported feeling angry/outraged (anger), anxious/afraid (anxiety), and enthusiastic/happy (enthusiasm) about the tweets they saw in waves 2 and 3.

**Table SI-19. Wave 2→3 change within condition in reactions to norm violations (by Trump approval)**

**(a) Statistical model results**

|                         | Anger             |                      | Anxiety           |                   | Enthusiasm       |                  |
|-------------------------|-------------------|----------------------|-------------------|-------------------|------------------|------------------|
|                         | Election          | General              | Election          | General           | Election         | General          |
| Wave 3                  | -0.061<br>(0.032) | -0.143***<br>(0.032) | -0.076<br>(0.031) | -0.068<br>(0.034) | 0.008<br>(0.025) | 0.001<br>(0.030) |
| Wave 3 × Trump approver | 0.025<br>(0.060)  | 0.181*<br>(0.057)    | -0.026<br>(0.058) | 0.047<br>(0.058)  | 0.063<br>(0.063) | 0.020<br>(0.065) |
| N                       | 1370              | 1365                 | 1310              | 1304              | 1310             | 1304             |

\*  $p < .05$ , \*\*  $p < .01$ , \*\*\*  $p < .005$  (two-sided; adjusted to control the false discovery rate (4) with  $\alpha = .05$ ). Cell entries are OLS coefficients with robust standard errors in parentheses. All models control for pre-treatment variables selected as most prognostic via lasso regression (see preregistration for details and list of candidate variables). Dependent variables are factor scores combining responses to questions on political violence and support for democracy.

**(b) Subgroup marginal effects**

|                   | Anger             |                      | Anxiety           |                   | Enthusiasm       |                  |
|-------------------|-------------------|----------------------|-------------------|-------------------|------------------|------------------|
|                   | Election          | General              | Election          | General           | Election         | General          |
| Trump approver    | -0.036<br>(0.051) | 0.038<br>(0.048)     | -0.102<br>(0.049) | -0.021<br>(0.047) | 0.070<br>(0.058) | 0.021<br>(0.058) |
| Trump disapprover | -0.061<br>(0.032) | -0.143***<br>(0.032) | -0.076<br>(0.031) | -0.068<br>(0.034) | 0.008<br>(0.025) | 0.001<br>(0.030) |

\*  $p < .05$ , \*\*  $p < .01$ , \*\*\*  $p < .005$  (two-sided; adjusted to control the false discovery rate (4) with  $\alpha = .05$ ). Marginal effect estimates calculated from Table SI-19a.

**Table SI-20. Wave 2→3 change within condition in reactions to norm violations (by party)**

**(a) Statistical model results**

|                     | Anger             |                      | Anxiety           |                   | Enthusiasm        |                   |
|---------------------|-------------------|----------------------|-------------------|-------------------|-------------------|-------------------|
|                     | Election          | General              | Election          | General           | Election          | General           |
| Wave 3              | -0.062<br>(0.034) | -0.134***<br>(0.034) | -0.088<br>(0.034) | -0.067<br>(0.037) | 0.039<br>(0.028)  | -0.015<br>(0.031) |
| Wave 3 × Republican | 0.019<br>(0.056)  | 0.122<br>(0.055)     | 0.013<br>(0.054)  | 0.022<br>(0.056)  | -0.019<br>(0.056) | 0.041<br>(0.059)  |
| N                   | 1357              | 1357                 | 1296              | 1298              | 1296              | 1298              |

\*  $p < .05$ , \*\*  $p < .01$ , \*\*\*  $p < .005$  (two-sided; adjusted to control the false discovery rate (4) with  $\alpha = .05$ ). Cell entries are OLS coefficients with robust standard errors in parentheses. Reference category for Republican indicator is Democrats (party variables include leaners; true independents excluded). All models control for pre-treatment variables selected as most prognostic via lasso regression (see preregistration for details and list of candidate variables). Dependent variables are factor scores combining responses to questions on political violence and support for democracy.

**(b) Subgroup marginal effects**

|            | Anger             |                      | Anxiety           |                   | Enthusiasm       |                   |
|------------|-------------------|----------------------|-------------------|-------------------|------------------|-------------------|
|            | Election          | General              | Election          | General           | Election         | General           |
| Republican | -0.043<br>(0.044) | -0.012<br>(0.043)    | -0.075<br>(0.041) | -0.045<br>(0.042) | 0.019<br>(0.048) | 0.027<br>(0.050)  |
| Democrat   | -0.062<br>(0.034) | -0.134***<br>(0.034) | -0.088<br>(0.034) | -0.067<br>(0.037) | 0.039<br>(0.028) | -0.015<br>(0.031) |

\*  $p < .05$ , \*\*  $p < .01$ , \*\*\*  $p < .005$  (two-sided; adjusted to control the false discovery rate (4) with  $\alpha = .05$ ). Marginal effect estimates calculated from Table SI-20a.

**Table SI-21. Treatment effects on emotional reactions to violations of democratic norms**

|                                    | Anger             | Anxiety           | Enthusiasm        |
|------------------------------------|-------------------|-------------------|-------------------|
| Election norm violations           | -0.155<br>(0.054) | -0.140<br>(0.053) | 0.018<br>(0.031)  |
| General norm violations            | -0.139<br>(0.053) | -0.142<br>(0.053) | 0.028<br>(0.031)  |
| Election – General norm violations | -0.016<br>(0.053) | 0.002<br>(0.051)  | -0.010<br>(0.031) |
| Control variables                  | ✓                 | ✓                 | ✓                 |
| N                                  | 1991              | 1992              | 2001              |

\*  $p < .05$ , \*\*  $p < .01$ , \*\*\*  $p < .005$  (two-sided; adjusted to control the false discovery rate (4) with  $\alpha = .05$ ). Cell entries are OLS coefficients with robust standard errors in parentheses. All models control for pre-treatment variables selected as most prognostic via lasso regression (see preregistration for details and list of candidate variables). Dependent variables are mean values of how much people reported feeling angry/outraged (anger), anxious/afraid (anxiety), and enthusiastic/happy (enthusiasm) after seeing four tweets violating election norms in wave 4. Marginal effects of the treatments on these outcomes (“Election – General norm violations” row) were not preregistered and are thus exploratory; we include these estimates for presentational consistency.

**Table SI-22. Treatment effects on emotional reactions to violations of democratic norms (by Trump approval)**

**(a) Statistical model results**

|                                | Anger             | Anxiety            | Enthusiasm        |
|--------------------------------|-------------------|--------------------|-------------------|
| Election norm violations       | -0.127<br>(0.064) | -0.140<br>(0.064)  | -0.002<br>(0.030) |
| Election norm × Trump approver | -0.098<br>(0.119) | -0.004<br>(0.112)  | 0.061<br>(0.083)  |
| General norm violations        | -0.162<br>(0.063) | -0.196*<br>(0.065) | -0.039<br>(0.029) |
| General norm × Trump approver  | 0.079<br>(0.116)  | 0.182<br>(0.112)   | 0.225<br>(0.084)  |
| Control variables              | ✓                 | ✓                  | ✓                 |
| N                              | 1991              | 1992               | 2001              |

\*  $p < .05$ , \*\*  $p < .01$ , \*\*\*  $p < .005$  (two-sided; adjusted to control the false discovery rate (4) with  $\alpha = .05$ ). Cell entries are OLS coefficients with robust standard errors in parentheses. All models control for pre-treatment variables selected as most prognostic via lasso regression (see preregistration for details and list of candidate variables). Dependent variables are factor scores combining responses to questions on political violence and support for democracy.

**(b) Subgroup marginal effects**

|                                | Anger             | Anxiety            | Enthusiasm        |
|--------------------------------|-------------------|--------------------|-------------------|
| <i>Election norm violation</i> |                   |                    |                   |
| Trump approver                 | -0.224<br>(0.100) | -0.143<br>(0.092)  | 0.059<br>(0.077)  |
| Trump disapprover              | -0.127<br>(0.064) | -0.140<br>(0.064)  | -0.002<br>(0.030) |
| <i>General norm violation</i>  |                   |                    |                   |
| Trump approver                 | -0.083<br>(0.097) | -0.014<br>(0.092)  | 0.185<br>(0.079)  |
| Trump disapprover              | -0.162<br>(0.063) | -0.196*<br>(0.065) | -0.039<br>(0.029) |

\*  $p < .05$ , \*\*  $p < .01$ , \*\*\*  $p < .005$  (two-sided; adjusted to control the false discovery rate (4) with  $\alpha = .05$ ). Marginal effect estimates calculated from Table SI-22a.



**Table SI-23. Treatment effects on emotional reactions to violations of democratic norms (by party)**

**(a) Statistical model results**

|                          | Anger             | Anxiety           | Enthusiasm        |
|--------------------------|-------------------|-------------------|-------------------|
| Election norm violations | -0.110<br>(0.067) | -0.157<br>(0.069) | -0.009<br>(0.034) |
| Election norm × Repub.   | -0.117<br>(0.113) | 0.027<br>(0.108)  | 0.051<br>(0.071)  |
| General norm violations  | -0.146<br>(0.067) | -0.191<br>(0.070) | -0.054<br>(0.032) |
| General norm × Repub.    | 0.026<br>(0.110)  | 0.128<br>(0.109)  | 0.199<br>(0.073)  |
| Control variables        | ✓                 | ✓                 | ✓                 |
| N                        | 1960              | 1961              | 1970              |

\*  $p < .05$ , \*\*  $p < .01$ , \*\*\*  $p < .005$  (two-sided; adjusted to control the false discovery rate (4) with  $\alpha = .05$ ). Cell entries are OLS coefficients with robust standard errors in parentheses. Reference category for Republican indicator is Democrats (party variables include leaners; true independents excluded). All models control for pre-treatment variables selected as most prognostic via lasso regression (see preregistration for details and list of candidate variables). Dependent variables are factor scores combining responses to questions on political violence and support for democracy.

**(b) Subgroup marginal effects**

|                                | Anger             | Anxiety           | Enthusiasm        |
|--------------------------------|-------------------|-------------------|-------------------|
| <i>Election norm violation</i> |                   |                   |                   |
| Republican                     | -0.227<br>(0.091) | -0.130<br>(0.084) | 0.042<br>(0.062)  |
| Democrat                       | -0.110<br>(0.067) | -0.157<br>(0.069) | -0.009<br>(0.034) |
| <i>General norm violation</i>  |                   |                   |                   |
| Republican                     | -0.120<br>(0.088) | -0.063<br>(0.084) | 0.146<br>(0.066)  |
| Democrat                       | -0.146<br>(0.067) | -0.191<br>(0.070) | -0.054<br>(0.032) |

\*  $p < .05$ , \*\*  $p < .01$ , \*\*\*  $p < .005$  (two-sided; adjusted to control the false discovery rate (4) with  $\alpha = .05$ ). Marginal effect estimates calculated from Table SI-23a.

Table SI-24. Main effects of exposure to norm violations (no controls)

|                                    | Trust in elections | Accept election   | Elections rigged  | Election violence | Political violence | Support democracy |
|------------------------------------|--------------------|-------------------|-------------------|-------------------|--------------------|-------------------|
| Election norm violations           | -0.014<br>(0.049)  | -0.010<br>(0.040) | 0.084<br>(0.077)  | 0.005<br>(0.056)  | -0.067<br>(0.052)  | -0.034<br>(0.041) |
| General norm violations            | -0.020<br>(0.050)  | -0.013<br>(0.040) | 0.183<br>(0.076)  | 0.144<br>(0.059)  | 0.043<br>(0.057)   | 0.037<br>(0.044)  |
| Election – General norm violations | 0.006<br>(0.049)   | 0.003<br>(0.039)  | -0.099<br>(0.075) | -0.139<br>(0.058) | -0.110<br>(0.053)  | -0.071<br>(0.042) |
| N                                  | 2147               | 2147              | 2147              | 2147              | 2011               | 2011              |

\*  $p < .05$ , \*\*  $p < .01$ , \*\*\*  $p < .005$  (two-sided; adjusted to control the false discovery rate (4) with  $\alpha = .05$ ). Cell entries are OLS coefficients with robust standard errors in parentheses. Outcome variables for first four models calculated as mean of non-missing values for each respondent across waves 2–4 (see the Supporting Information for results by wave). Support for political violence and democracy were measured in wave 4.

Table SI-25. Treatment effects on trust and confidence in elections (no controls)

|                                    | Wave 2           | Wave 3            | Wave 4            | Mean              |
|------------------------------------|------------------|-------------------|-------------------|-------------------|
| Election norm violations           | 0.011<br>(0.051) | -0.038<br>(0.053) | -0.027<br>(0.052) | -0.014<br>(0.049) |
| General norm violations            | 0.010<br>(0.052) | -0.039<br>(0.054) | -0.042<br>(0.053) | -0.020<br>(0.050) |
| Election – General norm violations | 0.001<br>(0.050) | 0.001<br>(0.054)  | 0.015<br>(0.053)  | 0.006<br>(0.049)  |
| N                                  | 2147             | 1960              | 2011              | 2147              |

\*  $p < .05$ , \*\*  $p < .01$ , \*\*\*  $p < .005$  (two-sided; adjusted to control the false discovery rate (4) with  $\alpha = .05$ ). Cell entries are OLS coefficients with robust standard errors in parentheses. Dependent variables are standardized factor scores. Mean outcome calculated among non-missing values for each respondent.

**Table SI-26. Treatment effects on support for democratic norms (no controls)**

|                                    | Accept election results peacefully |                   |                   |                   | Elections rigged for other party |                   |                   |                   | Violence needed during vote count |                   |                   |                   |
|------------------------------------|------------------------------------|-------------------|-------------------|-------------------|----------------------------------|-------------------|-------------------|-------------------|-----------------------------------|-------------------|-------------------|-------------------|
|                                    | Wave 2                             | Wave 3            | Wave 4            | Mean              | Wave 2                           | Wave 3            | Wave 4            | Mean              | Wave 2                            | Wave 3            | Wave 4            | Mean              |
| Election norm violations           | -0.053<br>(0.048)                  | -0.008<br>(0.049) | 0.002<br>(0.048)  | -0.010<br>(0.040) | 0.163<br>(0.083)                 | 0.175<br>(0.086)  | -0.017<br>(0.084) | 0.084<br>(0.077)  | 0.058<br>(0.062)                  | 0.023<br>(0.065)  | -0.011<br>(0.065) | 0.005<br>(0.056)  |
| General norm violations            | -0.043<br>(0.046)                  | -0.028<br>(0.050) | 0.002<br>(0.048)  | -0.013<br>(0.040) | 0.219<br>(0.081)                 | 0.241<br>(0.086)  | 0.123<br>(0.084)  | 0.183<br>(0.076)  | 0.196<br>(0.064)                  | 0.138<br>(0.067)  | 0.131<br>(0.068)  | 0.144<br>(0.059)  |
| Election – General norm violations | -0.010<br>(0.048)                  | 0.019<br>(0.047)  | -0.001<br>(0.048) | 0.003<br>(0.039)  | -0.056<br>(0.082)                | -0.065<br>(0.085) | -0.140<br>(0.083) | -0.099<br>(0.075) | -0.138<br>(0.064)                 | -0.115<br>(0.067) | -0.142<br>(0.067) | -0.139<br>(0.058) |
| N                                  | 2147                               | 1960              | 2011              | 2147              | 2147                             | 1959              | 2011              | 2147              | 2147                              | 1960              | 2011              | 2147              |

\*  $p < .05$ , \*\*  $p < .01$ , \*\*\*  $p < .005$  (two-sided; adjusted to control the false discovery rate (4) with  $\alpha = .05$ ). Cell entries are OLS coefficients with robust standard errors in parentheses. Mean outcome calculated among non-missing values for each respondent.

**Table SI-27. Treatment effects on support for political violence and democracy (no controls)**

|                                    | Political violence | Support for democracy |
|------------------------------------|--------------------|-----------------------|
| Election norm violations           | -0.067<br>(0.052)  | -0.034<br>(0.041)     |
| General norm violations            | 0.043<br>(0.057)   | 0.037<br>(0.044)      |
| Election – General norm violations | -0.110<br>(0.053)  | -0.071<br>(0.042)     |
| N                                  | 2011               | 2011                  |

\*  $p < .05$ , \*\*  $p < .01$ , \*\*\*  $p < .005$  (two-sided; adjusted to control the false discovery rate (4) with  $\alpha = .05$ ). Cell entries are OLS coefficients with robust standard errors in parentheses. Dependent variables are factor scores combining responses to questions on political violence and support for democracy. Marginal effects of the treatments on these outcomes (“Election – General norm violations” row) were not preregistered and are thus exploratory; we include these estimates for presentational consistency.

**Table SI-28. Treatment effects on trust and confidence in elections (by Trump approval; no controls)**

|                                | Wave 2               | Wave 3               | Wave 4               | Mean                 |
|--------------------------------|----------------------|----------------------|----------------------|----------------------|
| Election norm violations       | 0.197*<br>(0.061)    | 0.145<br>(0.063)     | 0.119<br>(0.063)     | 0.166*<br>(0.059)    |
| Election norm × Trump approver | -0.593***<br>(0.109) | -0.605***<br>(0.115) | -0.480***<br>(0.112) | -0.576***<br>(0.103) |
| General norm violations        | 0.129<br>(0.061)     | 0.049<br>(0.064)     | 0.026<br>(0.063)     | 0.079<br>(0.059)     |
| General norm × Trump approver  | -0.399**<br>(0.113)  | -0.317*<br>(0.119)   | -0.242<br>(0.118)    | -0.337*<br>(0.108)   |
| N                              | 2137                 | 1950                 | 2001                 | 2137                 |

\*  $p < .05$ , \*\*  $p < .01$ , \*\*\*  $p < .005$  (two-sided; adjusted to control the false discovery rate (4) with  $\alpha = .05$ ). Cell entries are OLS coefficients with robust standard errors in parentheses. Dependent variables are standardized factor scores. Mean outcome calculated among non-missing values for each respondent.

**Table SI-29. Treatment effects on trust and confidence in elections (by party; no controls)**

|                          | Wave 2               | Wave 3              | Wave 4             | Mean                 |
|--------------------------|----------------------|---------------------|--------------------|----------------------|
| Election norm violations | 0.171*<br>(0.066)    | 0.113<br>(0.068)    | 0.087<br>(0.067)   | 0.129<br>(0.062)     |
| Election norm × Repub.   | -0.419***<br>(0.105) | -0.397**<br>(0.110) | -0.290*<br>(0.108) | -0.374***<br>(0.100) |
| General norm violations  | 0.119<br>(0.066)     | 0.033<br>(0.069)    | 0.026<br>(0.067)   | 0.065<br>(0.063)     |
| General norm × Repub.    | -0.294*<br>(0.107)   | -0.197<br>(0.112)   | -0.191<br>(0.111)  | -0.235<br>(0.103)    |
| N                        | 2114                 | 1931                | 1980               | 2114                 |

\*  $p < .05$ , \*\*  $p < .01$ , \*\*\*  $p < .005$  (two-sided; adjusted to control the false discovery rate (4) with  $\alpha = .05$ ). Cell entries are OLS coefficients with robust standard errors in parentheses. Reference category for Republican indicator is Democrats (party variables include leaners; true independents excluded). Dependent variables are standardized factor scores. Mean outcome calculated among non-missing values for each respondent.

**Table SI-30. Statistical models of support for democratic norms (by Trump approval; no controls)**

|                                | Accept election results peacefully |                   |                   |                   | Elections rigged for other party |                   |                   |                   | Violence needed during vote count |                   |                   |                   |
|--------------------------------|------------------------------------|-------------------|-------------------|-------------------|----------------------------------|-------------------|-------------------|-------------------|-----------------------------------|-------------------|-------------------|-------------------|
|                                | Wave 2                             | Wave 3            | Wave 4            | Mean              | Wave 2                           | Wave 3            | Wave 4            | Mean              | Wave 2                            | Wave 3            | Wave 4            | Mean              |
| Election norm violations       | 0.030<br>(0.051)                   | 0.060<br>(0.054)  | 0.039<br>(0.052)  | 0.045<br>(0.043)  | -0.046<br>(0.104)                | 0.002<br>(0.105)  | -0.121<br>(0.102) | -0.077<br>(0.096) | -0.014<br>(0.071)                 | -0.053<br>(0.078) | -0.089<br>(0.076) | -0.071<br>(0.066) |
| Election norm × Trump approver | -0.271<br>(0.114)                  | -0.227<br>(0.114) | -0.128<br>(0.115) | -0.180<br>(0.096) | 0.686***<br>(0.170)              | 0.569*<br>(0.184) | 0.344<br>(0.179)  | 0.522*<br>(0.158) | 0.230<br>(0.143)                  | 0.245<br>(0.141)  | 0.240<br>(0.145)  | 0.234<br>(0.125)  |
| General norm violations        | -0.044<br>(0.053)                  | 0.017<br>(0.054)  | -0.000<br>(0.053) | -0.011<br>(0.044) | 0.181<br>(0.100)                 | 0.161<br>(0.104)  | 0.084<br>(0.101)  | 0.139<br>(0.094)  | 0.170<br>(0.074)                  | 0.048<br>(0.078)  | 0.053<br>(0.078)  | 0.084<br>(0.068)  |
| General norm × Trump approver  | -0.016<br>(0.106)                  | -0.146<br>(0.117) | -0.007<br>(0.117) | -0.016<br>(0.094) | 0.149<br>(0.170)                 | 0.297<br>(0.182)  | 0.171<br>(0.181)  | 0.174<br>(0.158)  | 0.090<br>(0.143)                  | 0.307<br>(0.150)  | 0.263<br>(0.160)  | 0.200<br>(0.132)  |
| N                              | 2137                               | 1950              | 2001              | 2137              | 2137                             | 1949              | 2001              | 2137              | 2137                              | 1950              | 2001              | 2137              |

\*  $p < .05$ , \*\*  $p < .01$ , \*\*\*  $p < .005$  (two-sided; adjusted to control the false discovery rate (4) with  $\alpha = .05$ ). Cell entries are OLS coefficients with robust standard errors in parentheses. Mean outcome calculated among non-missing values for each respondent.

**Table SI-31. Statistical models of support for democratic norms (by party; no controls)**

|                          | Accept election results peacefully |                   |                   |                   | Elections rigged for other party |                   |                   |                   | Violence needed during vote count |                   |                   |                   |
|--------------------------|------------------------------------|-------------------|-------------------|-------------------|----------------------------------|-------------------|-------------------|-------------------|-----------------------------------|-------------------|-------------------|-------------------|
|                          | Wave 2                             | Wave 3            | Wave 4            | Mean              | Wave 2                           | Wave 3            | Wave 4            | Mean              | Wave 2                            | Wave 3            | Wave 4            | Mean              |
| Election norm violations | 0.023<br>(0.057)                   | 0.069<br>(0.058)  | -0.004<br>(0.058) | 0.034<br>(0.048)  | -0.057<br>(0.110)                | -0.004<br>(0.112) | -0.113<br>(0.108) | -0.081<br>(0.101) | -0.075<br>(0.079)                 | -0.114<br>(0.086) | -0.126<br>(0.084) | -0.121<br>(0.073) |
| Election norm × Repub.   | -0.192<br>(0.104)                  | -0.181<br>(0.105) | 0.039<br>(0.104)  | -0.095<br>(0.087) | 0.564**<br>(0.163)               | 0.462*<br>(0.172) | 0.255<br>(0.168)  | 0.420*<br>(0.151) | 0.344*<br>(0.131)                 | 0.354*<br>(0.132) | 0.300<br>(0.132)  | 0.323*<br>(0.116) |
| General norm violations  | -0.066<br>(0.059)                  | 0.015<br>(0.059)  | -0.005<br>(0.057) | -0.021<br>(0.048) | 0.199<br>(0.105)                 | 0.161<br>(0.111)  | 0.064<br>(0.106)  | 0.139<br>(0.098)  | 0.140<br>(0.082)                  | 0.020<br>(0.087)  | 0.021<br>(0.086)  | 0.063<br>(0.075)  |
| General norm × Repub.    | 0.080<br>(0.096)                   | -0.093<br>(0.108) | 0.036<br>(0.105)  | 0.040<br>(0.085)  | 0.047<br>(0.160)                 | 0.187<br>(0.171)  | 0.157<br>(0.169)  | 0.107<br>(0.149)  | 0.139<br>(0.132)                  | 0.300<br>(0.136)  | 0.290<br>(0.142)  | 0.207<br>(0.120)  |
| N                        | 2114                               | 1931              | 1980              | 2114              | 2114                             | 1930              | 1980              | 2114              | 2114                              | 1931              | 1980              | 2114              |

\*  $p < .05$ , \*\*  $p < .01$ , \*\*\*  $p < .005$  (two-sided; adjusted to control the false discovery rate (4) with  $\alpha = .05$ ). Cell entries are OLS coefficients with robust standard errors in parentheses. Reference category for Republican indicator is Democrats (party variables include leaners; true independents excluded). Mean outcome calculated among non-missing values for each respondent.



**Table SI-32. Treatment effects on support for political violence and democracy (by Trump approval; no controls)**

|                                | Political violence | Support for democracy |
|--------------------------------|--------------------|-----------------------|
| Election norm violations       | -0.056<br>(0.058)  | -0.079<br>(0.044)     |
| Election norm × Trump approver | -0.020<br>(0.123)  | 0.125<br>(0.102)      |
| General norm violations        | -0.038<br>(0.057)  | -0.005<br>(0.048)     |
| General norm × Trump approver  | 0.302<br>(0.145)   | 0.151<br>(0.108)      |
|                                | 2001               | 2001                  |

\*  $p < .05$ , \*\*  $p < .01$ , \*\*\*  $p < .005$  (two-sided; adjusted to control the false discovery rate (4) with  $\alpha = .05$ ). Cell entries are OLS coefficients with robust standard errors in parentheses. Dependent variables are factor scores combining responses to questions on political violence and support for democracy.

**Table SI-33. Treatment effects on support for political violence and democracy (by party; no controls)**

|                                      | Political violence | Support for democracy |
|--------------------------------------|--------------------|-----------------------|
| Election norm violations             | -0.085<br>(0.067)  | -0.057<br>(0.045)     |
| Election norm violation × Republican | 0.039<br>(0.110)   | 0.052<br>(0.096)      |
| General norm violations              | -0.049<br>(0.067)  | 0.018<br>(0.048)      |
| General norm violation × Republican  | 0.215<br>(0.121)   | 0.034<br>(0.100)      |
|                                      | 1980               | 1980                  |

\*  $p < .05$ , \*\*  $p < .01$ , \*\*\*  $p < .005$  (two-sided; adjusted to control the false discovery rate (4) with  $\alpha = .05$ ). Cell entries are OLS coefficients with robust standard errors in parentheses. Reference category for Republican indicator is Democrats (party variables include leaners; true independents excluded). Dependent variables are factor scores combining responses to questions on political violence and support for democracy.

**Table SI-34. Treatment effects on perceptions of past respect for democratic norms (no controls)**

|                                    | Wave 2            | Wave 3            | Wave 4            | Mean              |
|------------------------------------|-------------------|-------------------|-------------------|-------------------|
| Election norm violations           | -0.013<br>(0.037) | 0.015<br>(0.038)  | 0.053<br>(0.035)  | 0.018<br>(0.031)  |
| General norm violations            | 0.001<br>(0.037)  | -0.006<br>(0.038) | 0.069<br>(0.035)  | 0.023<br>(0.031)  |
| Election – General norm violations | -0.014<br>(0.037) | 0.021<br>(0.038)  | -0.015<br>(0.035) | -0.005<br>(0.032) |
| N                                  | 2147              | 1960              | 2011              | 2147              |

\*  $p < .05$ , \*\*  $p < .01$ , \*\*\*  $p < .005$  (two-sided; adjusted to control the false discovery rate (4) with  $\alpha = .05$ ). Cell entries are OLS coefficients with robust standard errors in parentheses. Dependent variables are respondent belief that presidential candidates in the past fifty years have accepted the outcome of elections even if they narrowly lose. Mean outcome calculated among non-missing values for each respondent. Marginal effects of the treatments on these outcomes (“Election – General norm violations” row) were not preregistered and are thus exploratory; we include these estimates for presentational consistency.

**Table SI-35. Treatment effects on perceptions of past respect for democratic norms (by Trump approval; no controls)**

|                                | Wave 2            | Wave 3            | Wave 4            | Mean              |
|--------------------------------|-------------------|-------------------|-------------------|-------------------|
| Election norm violations       | 0.006<br>(0.043)  | 0.072<br>(0.043)  | 0.086<br>(0.041)  | 0.052<br>(0.036)  |
| Election norm × Trump approver | -0.064<br>(0.084) | -0.181<br>(0.086) | -0.100<br>(0.078) | -0.105<br>(0.070) |
| General norm violations        | 0.008<br>(0.043)  | 0.033<br>(0.044)  | 0.092<br>(0.041)  | 0.038<br>(0.037)  |
| General norm × Trump approver  | -0.036<br>(0.082) | -0.135<br>(0.088) | -0.074<br>(0.079) | -0.054<br>(0.069) |
| N                              | 2137              | 1950              | 2001              | 2137              |

\*  $p < .05$ , \*\*  $p < .01$ , \*\*\*  $p < .005$  (two-sided; adjusted to control the false discovery rate (4) with  $\alpha = .05$ ). Cell entries are OLS coefficients with robust standard errors in parentheses. Dependent variables are factor scores combining responses to questions on political violence and support for democracy.

**Table SI-36. Treatment effects on perceptions of past respect for democratic norms (by party; no controls)**

|                                      | Wave 2            | Wave 3            | Wave 4           | Mean              |
|--------------------------------------|-------------------|-------------------|------------------|-------------------|
| Election norm violations             | 0.016<br>(0.045)  | 0.089<br>(0.046)  | 0.058<br>(0.043) | 0.052<br>(0.037)  |
| Election norm violation × Republican | -0.067<br>(0.079) | -0.177<br>(0.081) | 0.003<br>(0.074) | -0.073<br>(0.067) |
| General norm violations              | -0.011<br>(0.046) | 0.047<br>(0.046)  | 0.069<br>(0.043) | 0.027<br>(0.039)  |
| General norm violation × Republican  | 0.031<br>(0.077)  | -0.115<br>(0.081) | 0.007<br>(0.075) | 0.001<br>(0.066)  |
| N                                    | 2114              | 1931              | 1980             | 2114              |

\*  $p < .05$ , \*\*  $p < .01$ , \*\*\*  $p < .005$  (two-sided; adjusted to control the false discovery rate (4) with  $\alpha = .05$ ). Cell entries are OLS coefficients with robust standard errors in parentheses. Dependent variables are factor scores combining responses to questions on political violence and support for democracy.

**Table SI-37. Treatment effects on emotional reactions to violations of democratic norms (no controls)**

|                                    | Anger             | Anxiety           | Enthusiasm        |
|------------------------------------|-------------------|-------------------|-------------------|
| Election norm violations           | -0.143<br>(0.056) | -0.115<br>(0.054) | 0.011<br>(0.032)  |
| General norm violations            | -0.114<br>(0.055) | -0.114<br>(0.055) | 0.035<br>(0.032)  |
| Election – General norm violations | -0.029<br>(0.055) | -0.001<br>(0.052) | -0.023<br>(0.032) |
| Control variables                  | ✓                 | ✓                 | ✓                 |
| N                                  | 2011              | 2011              | 2011              |

\*  $p < .05$ , \*\*  $p < .01$ , \*\*\*  $p < .005$  (two-sided; adjusted to control the false discovery rate (4) with  $\alpha = .05$ ). Cell entries are OLS coefficients with robust standard errors in parentheses. Dependent variables are mean values of how much people reported feeling angry/outraged (anger), anxious/afraid (anxiety), and enthusiastic/happy (enthusiasm) after seeing four tweets violating election norms in wave 4. Marginal effects of the treatments on these outcomes (“Election – General norm violations” row) were not preregistered and are thus exploratory; we include these estimates for presentational consistency.

**Table SI-38. Treatment effects on emotional reactions to violations of democratic norms (by Trump approval; no controls)**

|                                | Anger             | Anxiety            | Enthusiasm        |
|--------------------------------|-------------------|--------------------|-------------------|
| Election norm violations       | -0.134<br>(0.067) | -0.134<br>(0.066)  | -0.013<br>(0.030) |
| Election norm × Trump approver | -0.043<br>(0.121) | 0.041<br>(0.115)   | 0.084<br>(0.086)  |
| General norm violations        | -0.142<br>(0.067) | -0.175*<br>(0.067) | -0.043<br>(0.029) |
| General norm × Trump approver  | 0.090<br>(0.117)  | 0.195<br>(0.116)   | 0.257*<br>(0.088) |
| Control variables              | ✓                 | ✓                  | ✓                 |
| N                              | 2001              | 2001               | 2001              |

\*  $p < .05$ , \*\*  $p < .01$ , \*\*\*  $p < .005$  (two-sided; adjusted to control the false discovery rate (4) with  $\alpha = .05$ ). Cell entries are OLS coefficients with robust standard errors in parentheses. Dependent variables are factor scores combining responses to questions on political violence and support for democracy.

**Table SI-39. Treatment effects on emotional reactions to violations of democratic norms (by party; no controls)**

|                                  | Anger             | Anxiety           | Enthusiasm        |
|----------------------------------|-------------------|-------------------|-------------------|
| Election norm violations         | -0.131<br>(0.070) | -0.157<br>(0.071) | -0.021<br>(0.035) |
| Election norm violation × Repub. | -0.038<br>(0.116) | 0.082<br>(0.111)  | 0.065<br>(0.073)  |
| General norm violations          | -0.129<br>(0.070) | -0.173<br>(0.071) | -0.057<br>(0.032) |
| General norm violation × Repub.  | 0.055<br>(0.112)  | 0.151<br>(0.111)  | 0.221*<br>(0.075) |
| N                                | 1980              | 1980              | 1980              |

\*  $p < .05$ , \*\*  $p < .01$ , \*\*\*  $p < .005$  (two-sided; adjusted to control the false discovery rate (4) with  $\alpha = .05$ ). Cell entries are OLS coefficients with robust standard errors in parentheses. Reference category for Republican indicator is Democrats (party variables include leaners; true independents excluded). Dependent variables are factor scores combining responses to questions on political violence and support for democracy.



**References**

- 937 1. D Volz, E Glazer, Facebook and other tech giants gird for chaotic election. *Wall Street Journal*, August 12, 2020. Downloaded  
938 October 26, 2020 from <https://www.wsj.com/articles/facebook-and-other-tech-giants-gird-for-chaotic-election-11597272121> (2020).
- 939 2. SB Glasser, Trump is the election crisis he is warning about. *The New Yorker*, July 31, 2020. [https://www.newyorker.com/  
940 news/letter-from-trumps-washington/trump-is-the-election-crisis-he-is-warning-about](https://www.newyorker.com/news/letter-from-trumps-washington/trump-is-the-election-crisis-he-is-warning-about) (2020).
- 941 3. JM Carey, G Helmke, B Nyhan, M Sanders, S Stokes, Searching for bright lines in the trump presidency. *Perspectives on  
942 Polit.* **17**, 699–718 (2019).
- 943 4. Y Benjamini, AM Krieger, D Yekutieli, Adaptive linear step-up procedures that control the false discovery rate. *Biometrika*  
944 **93**, 491–507 (2006).
